# Supplementary material for: Analysis of the Space and Time Distribution of Syphilis in Brazil: Cases of Acquired Syphilis From 2010-2018 and Congenital and Syphilis in Pregnant Women From 2001-2017
Source: Research Square preprint supplement (doi:10.21203/rs.3.rs-105722/v1), 2020-11-17
Supplement: Supplementary file 1 [file 83636b6ab4e6dc3df01e0d7c.xlsx]

## Sheet: S5 Table
Brazilian Region	States	Microregion	2001	2002	2003	2004	2005	2006	2007	2008	2009	2010	2011	2012	2013	2014	2015	2016	2017	Population 2001	Population 2002	Population 2003	Population 2004	Population 2005	Population 2006	Population 2007	Population 2008	Population 2009	Population 2010	Population 2011	Population 2012	Population 2013	Population 2014	Population 2015	Population 2016	Average Moving 02	Average Moving 03	Average Moving 04	Average Moving 05	Average Moving 06	Average Moving 07	Average Moving 08	Average Moving 09	Average Moving 10	Average Moving 11	Average Moving 12	Average Moving 13	Average Moving 14	Average Moving 15
North	AM	JAPURA	0	0	4	0	21	76	139	146	91	158	183	247	338	384	772	1283	1500	1.33333	1.33333	8.33333	32.3333	78.6667	120.333	125.333	131.667	144	196	256	338	498	813	1185	27909	28363	28827	32503	33280	33932	22798	23076	22373	24854	24951	25044	24393	23966	23548
Southeast	RJ	SANTO ANTONIO DE PADUA	0	0	0	0	0	0	210	427	39	978	1782	2023	2290	2851	2805	3710	892	0	0	0	0	70	212.333	225.333	481.333	933	1594.33	2031.67	2290	2648.67	3122	2469	118895	119802	120704	122593	123640	124678	118507	122895	123304	122374	122725	123059	123432	123562	123687
Southeast	MG	ITAGUARA	0	0	0	0	1	1	33	56	34	86	159	324	359	465	739	786	963	0	0	0.333333	0.666667	11.6667	30	41	58.6667	93	189.667	280.667	359	521	663.333	829.333	58274	58452	58620	58975	59168	59364	59678	61864	62199	61411	61672	61919	64051	64345	64626
Northeast	BA	JEREMOABO	0	0	0	1	1	1	43	35	63	162	290	389	496	615	640	959	847	0	0.333333	0.666667	1	15	26.3333	47	86.6667	171.667	280.333	391.667	496	583.667	738	815.333	117801	107519	108470	121410	122521	112646	101781	105010	104871	99393	98933	98486	103758	103472	103200
South	PR	IBAITI	107	89	5	0	70	86	99	67	34	89	202	238	287	415	517	586	566	67	31.3333	25	52	85	84	66.6667	63.3333	108.333	176.333	242.333	287	406.333	506	556.333	74740	75021	75294	75867	76181	76498	76570	79320	79752	77359	77587	77805	80534	80870	81195
Center-West	MS	CASSILANDIA	0	0	0	0	47	215	109	171	105	142	153	244	292	290	389	450	571	0	0	15.6667	87.3333	123.667	165	128.333	139.333	133.333	179.667	229.667	292	323.667	376.333	470	48351	49218	50140	51956	53025	54087	55401	57211	58198	60309	61323	63883	66525	67727	68900
Northeast	CE	COREAU	0	0	0	0	11	37	144	80	52	125	151	172	155	228	253	349	368	0	0	3.66667	16	64	87	92	85.6667	109.333	149.333	159.333	155	212	276.667	323.333	51074	51722	52364	53713	54459	55200	55070	57432	58110	55898	56326	56740	57796	58138	58469
Southeast	SP	CAMPOS DO JORDAO	0	0	0	0	4	14	20	46	36	96	106	154	192	282	324	346	321	0	0	1.33333	6	12.6667	26.6667	34	59.3333	79.3333	118.667	150.667	192	266	317.333	330.333	65715	66650	67625	69673	70806	71930	65774	68334	68662	68863	69196	69517	72166	72563	72950
Center-West	GO	RIO VERMELHO	0	0	0	0	0	0	75	91	21	93	121	140	220	333	274	302	426	0	0	0	0	25	55.3333	62.3333	68.3333	78.3333	118	160.333	220	275.667	303	334	91753	92054	92211	92537	92721	92899	86432	88304	87875	88389	88139	87890	89993	89792	89595
Northeast	PI	ALTO PARNAIBA PIAUIENSE	0	0	0	0	0	0	32	16	8	29	39	73	141	116	175	155	162	0	0	0	0	10.6667	16	18.6667	17.6667	25.3333	47	84.3333	141	144	148.667	164	37005	37331	37697	38464	38888	39309	41751	43035	43664	43606	44150	44674	45011	45289	45533
South	RS	SANTA ROSA	0	0	0	0	217	53	121	104	128	176	212	288	300	315	548	596	507	0	0	72.3333	90	130.333	92.6667	117.667	136	172	225.333	266.667	300	387.667	486.333	550.333	161762	161861	161997	159737	160375	161008	153333	157613	157553	157276	156956	156636	161909	161865	161826
Southeast	RJ	TRES RIOS	0	0	0	0	0	0	10	14	9	43	64	40	152	274	137	517	595	0	0	0	0	3.33333	8	11	22	38.6667	49	85.3333	152	187.667	309.333	416.333	145926	147263	148607	151430	152991	154542	148324	154978	155931	155644	156512	157349	158313	158889	159446
North	RR	NORDESTE DE RORAIMA	0	0	0	0	9	18	24	28	23	19	21	69	98	73	104	129	69	0	0	3	9	17	23.3333	25	23.3333	21	36.3333	62.6667	98	91.6667	102	100.667	30751	31528	32314	34165	34873	35780	36386	37387	38129	42160	43109	44023	45799	46668	47524
Northeast	PB	CURIMATAU ORIENTAL	0	0	0	0	0	0	6	5	3	14	28	15	43	91	154	137	113	0	0	0	0	2	3.66667	4.66667	7.33333	15	19	28.6667	43	96	127.333	134.667	93594	94005	94446	95369	95880	96388	93717	96853	97159	93423	67121	67541	69292	69808	70309
North	AC	CRUZEIRO DO South	0	0	0	0	0	17	22	24	19	20	62	52	74	184	265	302	222	0	0	0	5.66667	13	21	21.6667	21	33.6667	44.6667	62.6667	74	174.333	250.333	263	103208	105372	107676	113629	120295	123163	121343	126089	128368	131505	133691	135803	138755	141056	143320
Northeast	PB	SERIDO OCIDENTAL PARAIBANO	0	0	0	0	0	0	38	111	68	87	176	209	235	112	77	9	115	0	0	0	0	12.6667	49.6667	72.3333	88.6667	110.333	157.333	206.667	235	141.333	66	67	36861	36885	36937	37045	37104	37163	38358	39442	39682	39132	38286	38254	39218	39495	39758
South	RS	VACARIA	0	0	0	0	0	0	2	29	27	25	36	47	99	178	266	254	252	0	0	0	0	0.666667	10.3333	19.3333	27	29.3333	36	60.6667	99	181	232.667	257.333	154726	155467	156275	192165	194344	196506	192429	201161	202916	157337	157622	157890	163508	163922	164313
Northeast	RN	UMARIZAL	0	0	0	0	1	2	73	50	21	57	77	132	44	55	58	94	142	0	0	0.333333	1	25.3333	41.6667	48	42.6667	51.6667	88.6667	84.3333	44	52.3333	69	98	63691	63589	63376	62935	62689	62447	64454	66289	66461	64984	65061	65130	69117	69266	69410
Center-West	GO	ANICUNS	0	0	0	0	0	0	36	54	35	33	52	64	143	151	140	184	162	0	0	0	0	12	30	41.6667	40.6667	40	49.6667	86.3333	143	144.667	158.333	162	102235	102555	102864	109244	109527	109808	106833	110000	110114	109519	110112	110677	114583	115318	116043
South	RS	CARAZINHO	0	0	0	0	0	0	4	6	6	10	17	12	32	100	180	217	237	0	0	0	0	1.33333	3.33333	5.33333	7.33333	11	13	20.3333	32	104	165.667	211.333	159550	160031	160534	161589	162174	162753	158721	163750	164096	159953	160037	160112	165713	165976	166225
South	SC	TABULEIRO	0	0	0	0	0	0	0	0	1	3	2	2	8	8	22	22	51	0	0	0	0	0	0	0.333333	1.33333	2	2.33333	4	8	12.6667	17.3333	31.6667	23246	23259	23223	23149	22292	22239	23287	24078	24211	23928	24033	24132	24738	24874	25009
Northeast	AL	PALMEIRA DOS INDIOS	0	0	0	0	30	49	63	131	88	79	91	86	88	108	126	191	321	0	0	10	26.3333	47.3333	81	94	99.3333	86	85.3333	88.3333	88	107.333	141.667	212.667	175830	175757	175618	175325	175163	175002	173951	179429	179616	175127	175031	175361	181875	181915	181933
Southeast	MG	NANUQUE	0	0	0	0	0	0	14	12	15	6	41	68	65	94	106	101	184	0	0	0	0	4.66667	8.66667	13.6667	11	20.6667	38.3333	58	65	88.3333	100.333	130.333	118602	118886	118454	114774	114537	114308	113788	117956	118070	118762	118686	118607	122084	122104	122125
Northeast	SE	CARIRA	0	0	0	0	1	29	31	25	16	45	60	46	33	39	75	68	93	0	0	0.333333	10	20.3333	28.3333	24	28.6667	40.3333	50.3333	46.3333	33	49	60.6667	78.6667	62108	62692	63322	85193	86347	87495	85139	87734	88453	68509	69062	69595	72157	72766	73362
Southeast	RJ	BAIA DA ILHA GRANDE	0	0	0	0	2	9	30	50	28	51	69	114	160	160	205	280	243	0	0	0.666667	3.66667	13.6667	29.6667	36	43	49.3333	78	114.333	160	175	215	242.667	153515	157059	160895	168950	173407	177832	182233	199373	204394	207044	211517	215841	220920	224905	228754
South	RS	FREDERICO WESTPHALEN	0	0	0	0	0	0	14	21	6	24	41	76	63	71	172	167	212	0	0	0	0	4.66667	11.6667	13.6667	17	23.6667	47	60	63	102	136.667	183.667	182754	181617	180155	177090	175391	173707	177890	182320	181908	174605	173841	173085	178706	178344	178001
Southeast	RJ	CANTAGALO-CORDEIRO	0	0	0	0	0	3	2	1	1	2	1	9	10	49	53	75	69	0	0	0	1	1.66667	2	1.33333	1.33333	1.33333	4	6.66667	10	37.3333	59	65.6667	58982	59325	59656	60351	60737	61120	60697	63633	64092	62963	63299	63622	63992	64211	64420
Southeast	RJ	SANTA MARIA MADALENA	0	0	0	0	6	3	7	19	10	1	8	16	20	34	34	35	21	0	0	2	3	5.33333	9.66667	12	10	6.33333	8.33333	14.6667	20	29.3333	34.3333	30	28695	28826	28785	28697	28650	28602	28729	29688	29741	29505	29552	29595	29641	29634	29629
Northeast	CE	LAVRAS DA MANGABEIRA	0	0	0	0	0	0	5	1	6	25	21	28	25	55	63	47	63	0	0	0	0	1.66667	2	4	10.6667	17.3333	24.6667	24.6667	25	47.6667	55	57.6667	55847	56019	56073	56187	56250	56313	54727	56404	56405	56670	56732	56787	57516	57534	57551
South	RS	NAO-ME-TOQUE	0	0	0	0	0	0	5	2	1	10	14	5	18	20	35	49	48	0	0	0	0	1.66667	2.33333	2.66667	4.33333	8.33333	9.66667	12.3333	18	24.3333	34.6667	44	41478	41626	41791	43110	43334	43553	42279	43942	44091	42221	42297	42368	43873	43982	44087
Southeast	ES	CACHOEIRO DE ITAPEMIRIM	0	0	0	0	0	1	28	14	3	60	83	133	165	212	286	396	374	0	0	0	0.333333	9.66667	14.3333	15	25.6667	48.6667	92	127	165	221	298	352	315537	320439	324953	334423	339666	344869	332771	340923	343725	332189	333842	335435	357602	360232	362816
Southeast	SP	JALES	0	1	0	0	0	1	26	48	30	53	63	50	59	68	110	162	170	0.333333	0.333333	0	0.333333	9	25	34.6667	43.6667	48.6667	55.3333	57.3333	59	79	113.333	147.333	171217	171938	172802	174613	175618	176613	170403	176128	176591	149197	149406	149595	154618	154932	155236
South	RS	GUAPORE	0	0	0	0	1	0	1	1	1	8	8	24	37	71	102	125	157	0	0	0.333333	0.333333	0.666667	0.666667	1	3.33333	5.66667	13.3333	23	37	70	99.3333	128	116877	117621	118553	120514	121597	122674	124708	130230	131618	127249	128155	129018	133937	134776	135566
Northeast	AL	TRAIPU	0	0	0	0	2	1	1	1	2	2	5	9	14	27	24	39	43	0	0	0.666667	1	1.33333	1	1.33333	1.66667	3	5.33333	9.33333	14	21.6667	30	35.3333	35010	35138	35356	35650	35734	35895	36840	37626	37879	37377	37577	38080	39653	39837	40010
North	PA	SALGADO	0	0	0	0	24	39	129	78	46	97	124	135	182	258	193	216	281	0	0	8	21	64	82	84.3333	73.6667	89	118.667	147	182	211	222.333	230	220543	222337	225385	232295	235317	238830	238006	248166	251273	247146	249559	251888	256020	258222	260362
South	RS	LAJEADO-ESTRELA	0	0	0	0	0	0	16	27	19	25	30	36	80	140	231	327	303	0	0	0	0	5.33333	14.3333	20.6667	23.6667	24.6667	30.3333	48.6667	80	150.333	232.667	287	280885	283947	287077	293639	297270	300880	294306	306761	309522	305560	307752	309856	321692	323731	325652
Northeast	MA	MEDIO MEARIM	0	0	0	0	1	24	37	33	15	28	27	35	120	261	414	327	325	0	0	0.333333	8.33333	20.6667	31.3333	28.3333	25.3333	23.3333	30	60.6667	120	265	334	355.333	396052	398748	401242	406490	409392	412270	387451	398763	398963	411976	413078	414136	415203	415623	416015
South	RS	SANANDUVA	0	0	0	0	0	1	22	26	18	11	18	21	27	12	54	45	59	0	0	0	0.333333	7.66667	16.3333	22	18.3333	15.6667	16.6667	22	27	31	37	52.6667	61887	61418	60898	59806	59202	58602	60823	62464	62398	60636	60495	60354	62376	62343	62314
Center-West	MT	North ARAGUAIA	0	0	0	0	2	11	35	29	37	54	51	59	69	78	84	94	128	0	0	0.666667	4.33333	16	25	33.6667	40	47.3333	54.6667	59.6667	69	77	85.3333	102	91213	94203	97246	100713	104256	107777	100084	103940	105827	112238	114135	115959	119054	121056	123004
North	TO	BICO DO PAPAGAIO	0	0	0	0	6	8	67	39	31	87	76	92	69	77	129	146	233	0	0	2	4.66667	27	38	45.6667	52.3333	64.6667	85	79	69	91.6667	117.333	169.333	178024	181105	184295	188769	194708	198388	180721	185783	186804	196367	198079	199722	207214	209048	210839
Center-West	GO	PIRES DO RIO	0	0	0	0	0	0	24	19	7	22	14	21	56	75	81	61	88	0	0	0	0	8	14.3333	16.6667	16	14.3333	19	30.3333	56	70.6667	72.3333	76.6667	87411	88565	89653	91936	93197	94452	90202	93758	94450	93214	93755	94275	97659	98328	98984
Southeast	SP	AURIFLAMA	0	0	0	0	0	2	6	6	2	5	19	32	37	46	32	51	28	0	0	0	0.666667	2.66667	4.66667	4.66667	4.33333	8.66667	18.6667	29.3333	37	38.3333	43	37	44197	44240	44223	44192	44173	44154	45149	46880	47106	46367	46534	46688	48382	48586	48781
Northeast	SE	AGRESTE DE ITABAIANA	0	0	0	0	12	14	77	79	15	72	135	182	102	125	136	95	145	0	0	4	8.66667	34.3333	56.6667	57	55.3333	74	129.667	139.667	102	121	118.667	125.333	146848	149031	151316	156108	158761	161393	154458	159141	160544	160288	161533	162733	168667	170038	171382
Southeast	MG	PATROCINIO	0	0	0	0	0	0	4	4	3	23	36	64	95	133	162	118	173	0	0	0	0	1.33333	2.66667	3.66667	10	20.6667	41	65	95	130	137.667	151	187086	189573	192290	191015	193826	196615	185709	194760	196276	197700	198778	199817	206976	208163	209297
North	RO	CACOAL	0	0	0	0	0	0	4	2	2	19	46	71	84	127	173	193	155	0	0	0	0	1.33333	2	2.66667	7.66667	22.3333	45.3333	67	84	128	164.333	173.667	227135	228824	230452	237623	235767	237645	221257	227590	227620	228212	228440	228654	246464	247558	248619
South	RS	SANTO ANGELO	0	0	0	0	0	0	6	3	6	8	7	17	94	69	108	133	177	0	0	0	0	2	3	5	5.66667	7	10.6667	39.3333	94	90.3333	103.333	139.333	208471	208306	208067	207572	207297	207024	197549	201798	200894	196971	196069	195191	201518	201089	200685
Southeast	ES	ITAPEMIRIM	0	0	0	0	0	0	6	6	1	6	10	8	22	19	52	34	82	0	0	0	0	2	4	4.33333	4.33333	5.66667	8	13.3333	22	31	35	56	69623	71300	72701	75644	77271	78888	72344	75491	76166	75442	75994	76525	81880	82708	83504
Northeast	BA	COTEGIPE	0	0	0	0	0	0	20	1	3	34	39	41	53	58	71	76	96	0	0	0	0	6.66667	7	8	12.6667	25.3333	38	44.3333	53	60.6667	68.3333	81	147981	110827	110820	150399	151288	110794	114172	118413	119084	114824	115133	115428	121912	122358	122743
Center-West	GO	VALE DO RIO DOS BOIS	0	0	0	0	0	0	1	15	3	6	19	36	38	52	76	86	67	0	0	0	0	0.333333	5.33333	6.33333	8	9.33333	20.3333	31	38	55.3333	71.3333	76.3333	107613	109028	110356	113147	114692	116224	113427	118474	119636	113566	114503	115403	119921	121037	122130
North	PA	BRAGANTINA	0	0	0	0	1	4	93	90	45	120	139	125	174	216	242	227	275	0	0	0.333333	1.66667	32.6667	62.3333	76	85	101.333	128	146	174	210.667	228.333	248	334713	339311	344012	354674	359338	364759	354618	368508	372222	382765	386884	390863	397869	401712	405443
North	AM	TEFE	0	0	0	0	2	0	23	14	0	8	6	7	16	27	52	69	43	0	0	0.666667	0.666667	8.33333	12.3333	12.3333	7.33333	4.66667	7	9.66667	16	31.6667	49.3333	54.6667	89176	90859	92713	95856	98368	100480	77253	88278	88345	87432	87477	87520	90852	90982	91110
Northeast	PE	VALE DO IPOJUCA	0	0	0	0	80	123	147	131	75	176	254	340	363	448	494	499	665	0	0	26.6667	67.6667	116.667	133.667	117.667	127.333	168.333	256.667	319	363	435	480.333	552.667	752329	760275	768058	784398	793439	802412	796917	821052	828290	852171	860519	868208	897926	906609	915023
Southeast	ES	COLATINA	0	0	0	0	2	1	6	7	5	26	42	72	62	79	104	126	163	0	0	0.666667	1	3	4.66667	6	12.6667	24.3333	46.6667	58.6667	62	81.6667	103	131	186911	188294	189651	192500	194079	195644	187959	194465	195226	199711	200815	201881	215409	217125	218811
Center-West	GO	CHAPADA DOS VEADEIROS	0	0	0	0	0	0	8	15	10	11	16	15	43	32	34	40	47	0	0	0	0	2.66667	7.66667	11	12	12.3333	14	24.6667	43	36.3333	35.3333	40.3333	51845	52311	52782	53769	54315	54857	53789	55841	56258	62684	63201	63695	66188	66803	67406
South	SC	SAO MIGUEL D'OESTE	0	0	0	0	1	1	8	8	6	33	31	42	54	60	108	116	86	0	0	0.333333	0.666667	3.33333	5.66667	7.33333	15.6667	23.3333	35.3333	42.3333	54	74	94.6667	103.333	169166	167873	166342	164848	163232	161633	172637	177964	178402	174732	175018	175283	178659	179000	179344
South	RS	MONTENEGRO	0	0	0	0	0	1	41	28	9	30	33	37	42	75	108	101	167	0	0	0	0.333333	14	23.3333	26	22.3333	24	33.3333	37.3333	42	75	94.6667	125.333	180991	183721	186592	192617	195950	199258	190577	199216	201249	202517	204446	206297	214408	216118	217731
Center-West	MS	IGUATEMI	0	0	0	0	10	37	10	30	19	53	48	49	66	101	112	124	171	0	0	3.33333	15.6667	19	25.6667	19.6667	34	40	50	54.3333	66	93	112.333	135.667	202142	202234	202134	201925	201809	201696	212687	219097	220615	226333	228174	229949	236128	238165	240152
South	RS	TRES PASSOS	0	0	0	0	0	0	5	6	4	12	7	14	17	47	80	73	90	0	0	0	0	1.66667	3.66667	5	7.33333	7.66667	11	12.6667	17	48	66.6667	81	148851	147687	146266	143291	141637	140002	144599	148111	147706	143794	143269	142756	147448	147231	147030
Center-West	MT	TANGARA DA SERRA	0	0	0	0	0	2	30	38	19	56	35	54	77	80	69	91	99	0	0	0	0.666667	10.6667	23.3333	29	37.6667	36.6667	48.3333	55.3333	77	75.3333	80	86.3333	116688	119965	123358	130355	134294	138202	142889	148825	152422	144911	147397	149801	153881	156519	159087
Center-West	MS	ALTO TAQUARI	0	0	0	0	14	67	13	53	17	36	24	36	32	87	90	52	58	0	0	4.66667	27	31.3333	44.3333	27.6667	35.3333	25.6667	32	30.6667	32	69.6667	76.3333	66.6667	105817	106904	108240	111161	112712	114252	113291	116039	117160	117174	118180	119147	122435	123553	124641
Southeast	SP	PARAIBUNA/PARAITINGA	0	0	0	0	2	6	0	6	2	5	8	18	8	16	25	41	47	0	0	0.666667	2.66667	2.66667	4	2.66667	4.33333	5	10.3333	11.3333	8	16.3333	27.3333	37.6667	70874	71280	71650	72433	72866	73296	71146	73598	73854	70392	70390	70383	72619	72661	72704
Center-West	MS	TRES LAGOAS	0	0	0	0	1	1	6	42	15	36	48	44	69	86	105	101	61	0	0	0.333333	0.666667	2.66667	16.3333	21	31	33	42.6667	53.6667	69	86.6667	97.3333	89	127501	129891	131979	136361	138788	141196	136974	141873	143441	156246	158617	159326	165473	168170	170796
South	PR	PALMAS	0	0	0	0	0	4	11	18	13	23	22	17	16	34	48	36	63	0	0	0	1.33333	5	11	14	18	19.3333	20.6667	18.3333	16	32.6667	39.3333	49	85477	86058	86633	87840	88511	89173	88864	92287	92974	90369	90797	91210	94624	95186	95730
Southeast	SP	VOTUPORANGA	0	0	0	0	0	9	21	21	10	17	22	50	48	73	69	67	87	0	0	0	3	10	17	17.3333	16	16.3333	29.6667	40	48	63.3333	69.6667	74.3333	127667	128838	130071	159568	161934	164281	154452	161267	162397	139475	140499	141487	147335	148510	149651
Southeast	MG	SALINAS	0	0	0	0	1	1	6	3	1	1	13	19	37	59	89	101	138	0	0	0.333333	0.666667	2.66667	3.33333	3.33333	1.66667	5	11	23	37	61.6667	83	109.333	201399	203035	204537	192972	194721	196456	193922	200971	202426	210771	211622	212436	219727	220704	221638
South	RS	CERRO LARGO	0	0	0	0	0	0	3	1	0	1	1	4	2	11	25	25	47	0	0	0	0	1	1.33333	1.33333	0.666667	0.666667	2	2.33333	2	12.6667	20.3333	32.3333	69338	68905	68409	67368	66792	66222	66449	67893	67618	66065	65770	65480	67604	67463	67331
Southeast	SP	TUPA	0	0	0	0	17	8	6	10	5	21	23	18	35	42	57	48	57	0	0	5.66667	8.33333	10.3333	8	7	12	16.3333	20.6667	25.3333	35	44.6667	49	54	109273	109916	110585	111991	112768	113542	108306	112046	112315	109773	109877	109974	113609	113792	113970
South	RS	ERECHIM	0	0	0	0	0	7	7	10	3	6	12	24	25	61	70	128	112	0	0	0	2.33333	4.66667	8	6.66667	6.33333	7	14	20.3333	25	52	86.3333	103.333	213941	214695	215446	238165	239067	239966	231174	238065	238263	211653	211557	211452	218731	218925	219107
Center-West	MS	DOURADOS	0	0	0	0	21	99	44	108	83	104	104	86	84	136	166	264	357	0	0	7	40	54.6667	83.6667	78.3333	98.3333	97	98	91.3333	84	128.667	188.667	262.333	413372	418291	423293	433793	439604	445370	457280	470946	477046	500919	508097	515030	534220	542454	550484
South	PR	ASTORGA	0	0	0	0	1	0	5	1	15	31	38	46	50	47	84	91	100	0	0	0.333333	0.333333	2	2	7	15.6667	28	38.3333	44.6667	50	60.3333	74	91.6667	173321	174541	175071	176179	176793	177399	176718	182835	183640	183911	184728	185506	192370	193449	194497
Southeast	SP	ANDRADINA	0	0	0	0	0	1	22	11	12	24	26	34	40	67	93	78	97	0	0	0	0.333333	7.66667	11.3333	15	15.6667	20.6667	28	33.3333	40	66.6667	79.3333	89.3333	174896	175586	176325	177877	178738	179591	174424	180507	181016	181710	182307	182882	189489	190243	190976
North	AC	TARAUACA	0	0	1	0	0	6	18	11	18	7	21	34	37	39	39	26	46	0.333333	0.333333	0.333333	2	8	11.6667	15.6667	12	15.3333	20.6667	30.6667	37	38.3333	34.6667	37	58662	59693	60843	69767	73209	74738	69649	71911	72664	74579	75413	76221	77129	77929	78713
Northeast	PI	PIO IX	0	0	0	0	0	0	20	17	3	20	25	27	37	47	41	21	20	0	0	0	0	6.66667	12.3333	13.3333	13.3333	16	24	29.6667	37	41.6667	36.3333	27.3333	52767	52836	52876	52962	53010	53059	55917	57762	57861	57830	58239	58632	59065	59267	59522
North	PA	ITAITUBA	0	0	0	0	0	18	37	58	19	73	92	86	92	85	60	76	140	0	0	0	6	18.3333	37.6667	38	50	61.3333	83.6667	90	92	79	73.6667	92	204574	208713	213714	225055	230016	235781	245163	258332	264307	209531	211305	198678	243031	203005	204422
Southeast	SP	ARACATUBA	0	0	0	0	2	13	3	17	10	37	49	42	71	105	124	114	133	0	0	0.666667	5	6	11	10	21.3333	32	42.6667	54	71	100	114.333	123.667	235915	237710	239684	243822	246113	248388	248589	254812	256780	256560	258338	260052	270673	272723	274717
Northeast	CE	LITORAL DE CAMOCIM E ACARAU	0	0	0	0	6	58	57	47	18	73	115	155	119	134	155	141	209	0	0	2	21.3333	40.3333	54	40.6667	46	68.6667	114.333	129.667	119	136	143.333	168.333	321656	325288	329359	337905	342636	347331	345122	360295	364476	360892	363562	366853	374258	377048	379727
North	AC	BRASILEIA	0	0	0	0	0	0	6	7	7	5	12	10	10	9	18	28	41	0	0	0	0	2	4.33333	6.66667	6.33333	8	9	10.6667	10	12.3333	18.3333	29	44519	45275	46105	47834	50259	51295	52232	54196	55203	58661	59793	60887	62499	63722	64926
Center-West	MT	TESOURO	0	0	0	0	0	5	9	7	5	6	12	24	20	19	16	21	34	0	0	0	1.66667	4.66667	7	7	6	7.66667	14	18.6667	20	18.3333	18.6667	23.6667	53302	52702	52035	50632	49856	49086	53513	55021	55062	54507	54540	54567	54596	54544	54493
Northeast	BA	SEABRA	0	0	0	0	0	1	17	16	6	27	19	18	49	142	125	126	103	0	0	0	0.333333	6	11.3333	13	16.3333	17.3333	21.3333	28.6667	49	105.333	131	118	283766	255018	256861	293436	296288	266720	253831	261329	261980	254192	254300	254396	269630	270898	271254
South	RS	GRAMADO-CANELA	0	0	0	0	0	1	2	7	9	2	13	49	62	71	111	133	168	0	0	0	0.333333	1	3.33333	6	6	8	21.3333	41.3333	62	81.3333	105	137.333	267374	272662	278615	279758	286355	292901	273911	287228	290807	296581	299410	302136	314032	316544	318909
North	AP	AMAPA	0	0	0	0	0	0	0	1	0	0	1	1	2	11	17	11	9	0	0	0	0	0	0.333333	0.333333	0.333333	0.333333	0.666667	1.33333	2	10	13	12.3333	16966	17319	17687	17939	18884	19307	23260	24438	25229	24425	25032	25619	27052	27711	28365
South	PR	IVAIPORA	0	0	0	0	0	2	4	6	1	12	23	22	40	42	61	51	62	0	0	0	0.666667	2	4	3.66667	6.33333	12	19	28.3333	40	47.6667	51.3333	58	145879	143453	140649	134758	131498	128261	142726	145937	145441	137649	136746	135867	138951	138183	137442
South	SC	CONCORDIA	0	0	0	0	2	3	4	3	2	8	14	18	14	20	51	50	83	0	0	0.666667	1.66667	3	3.33333	3	4.33333	8	13.3333	15.3333	14	28.3333	40.3333	61.3333	137625	139336	140057	141577	142418	143249	139977	144506	145067	141990	142320	142634	145602	146019	146436
Southeast	SP	BIRIGUI	0	0	0	0	2	4	22	24	23	22	50	55	84	113	132	116	100	0	0	0.666667	2	9.33333	16.6667	23	23	31.6667	42.3333	63	84	109.667	120.333	116	231717	234432	237376	243558	246980	250376	246146	259566	262570	257531	259801	261986	273302	275866	278357
South	PR	PONTA GROSSA	0	0	0	0	2	32	8	16	10	15	36	55	93	95	161	197	220	0	0	0.666667	11.3333	14	18.6667	11.3333	13.6667	20.3333	35.3333	61.3333	93	116.333	151	192.667	389567	394648	400098	411541	417873	424159	419691	428397	432690	429981	433597	437091	455502	459835	464018
South	PR	JAGUARIAIVA	0	0	0	0	0	0	2	1	0	0	5	3	14	18	38	54	34	0	0	0	0	0.666667	1	1	0.333333	1.66667	2.66667	7.33333	14	23.3333	36.6667	42	95702	97020	98380	101235	102815	104383	100036	104123	105061	100299	100778	101239	105033	105662	106270
Center-West	MS	BODOQUENA	0	0	0	0	0	38	18	36	19	20	47	17	31	43	34	33	61	0	0	0	12.6667	18.6667	30.6667	24.3333	25	28.6667	28	31.6667	31	36	36.6667	42.6667	101756	103398	104779	107680	109283	110877	102088	105179	105573	105254	105627	105987	108009	108378	108738
Northeast	SE	PROPRIA	0	0	0	0	0	1	3	2	6	9	18	14	26	36	39	35	34	0	0	0	0.333333	1.33333	2	3.66667	5.66667	11	13.6667	19.3333	26	33.6667	36.6667	36	88837	89702	90640	250460	258667	266816	231891	239548	242029	91144	91416	91672	94413	94719	95020
Center-West	GO	IPORA	0	0	0	0	0	0	6	10	1	4	3	8	23	13	22	24	21	0	0	0	0	2	5.33333	5.66667	5	2.66667	5	11.3333	23	19.3333	19.6667	22.3333	62310	62316	62297	69387	69360	69333	65551	67026	66710	59086	58840	58597	59885	59662	59444
Southeast	MG	ARACUAI	0	0	0	0	0	0	3	2	0	3	6	21	35	33	51	62	69	0	0	0	0	1	1.66667	1.66667	1.66667	3	10	20.6667	35	39.6667	48.6667	60.6667	151726	152365	152603	145694	145853	146012	147919	152948	153632	156418	156772	157112	162215	162675	163120
Northeast	BA	SENHOR DO BONFIM	0	0	0	0	0	1	0	1	3	5	12	28	35	68	100	110	135	0	0	0	0.333333	0.333333	0.666667	1.33333	3	6.66667	15	25	35	67.6667	92.6667	115	202796	265138	262738	193411	190608	252203	280046	289579	291300	286781	288045	289262	307095	308568	309957
Northeast	MA	CHAPADAS DO ALTO ITAPECURU	0	0	0	0	1	0	47	41	14	15	14	31	29	54	79	92	68	0	0	0.333333	0.333333	16	29.3333	34	23.3333	14.3333	20	24.6667	29	54	75	79.6667	190210	192540	194214	194547	196733	198900	196732	202251	203878	209338	210912	212427	214158	215316	216408
Center-West	GO	VAO DO PARANA	0	0	0	0	0	0	3	19	22	14	19	19	31	26	35	26	69	0	0	0	0	1	7.33333	14.6667	18.3333	18.3333	17.3333	23	31	30.6667	29	43.3333	92682	93305	93922	95217	95935	96646	103946	107744	109268	107311	108495	109633	114333	115712	117066
Southeast	MG	JANUARIA	0	0	0	0	0	0	4	1	9	10	8	20	33	50	96	80	143	0	0	0	0	1.33333	1.66667	4.66667	6.66667	9	12.6667	20.3333	33	59.6667	75.3333	106.333	259009	261132	263013	336514	338959	341388	340842	353957	356570	274092	275405	276671	286396	287864	289271
Southeast	RJ	NOVA FRIBURGO	0	0	0	0	0	10	32	31	41	71	73	98	6	47	84	141	33	0	0	0	3.33333	14	24.3333	34.6667	47.6667	61.6667	80.6667	59	6	45.6667	90.6667	86	221644	222686	223664	225717	226854	227982	225208	230584	231406	233245	234219	235159	236231	236781	237312
South	RS	SANTA MARIA	0	0	0	0	0	0	5	15	11	28	39	52	60	69	120	167	119	0	0	0	0	1.66667	6.66667	10.3333	18	26	39.6667	50.3333	60	83	118.667	135.333	353830	357377	361070	368818	373105	377361	365773	372105	374105	363016	364066	365075	378275	379534	380721
South	SC	CAMPOS DE LAGES	0	0	0	0	0	0	0	5	0	2	22	40	42	51	91	77	131	0	0	0	0	0	1.66667	1.66667	2.33333	8	21.3333	34.6667	42	61.3333	73	99.6667	285702	288236	289758	292958	294731	296487	288963	298246	299345	284115	284060	283996	288367	288227	288088
Northeast	SE	JAPARATUBA	0	0	0	0	0	5	0	1	1	3	1	1	8	7	20	19	22	0	0	0	1.66667	1.66667	2	0.666667	1.66667	1.66667	1.66667	3.33333	8	11.6667	15.3333	20.3333	49729	50328	50989	52380	53150	53914	52514	54073	54558	54701	55149	55580	57634	58127	58607
Northeast	CE	MERUOCA	0	0	0	0	3	0	1	1	0	1	3	11	21	21	8	15	4	0	0	1	1	1.33333	0.666667	0.666667	0.666667	1.33333	5	11.6667	21	16.6667	14.6667	9	21114	21273	21452	21828	22036	22243	22402	23362	23596	24464	24739	25005	25548	25776	25995
Southeast	RJ	ITAPERUNA	0	0	0	0	0	0	29	39	16	47	39	60	50	117	77	99	31	0	0	0	0	9.66667	22.6667	28	34	34	48.6667	49.6667	50	81.3333	97.6667	69	181619	183079	184583	187742	189488	191224	188585	198402	200132	195119	196295	197431	198737	199546	200326
North	PA	OBIDOS	0	0	0	0	0	0	52	66	39	71	71	58	58	73	63	70	74	0	0	0	0	17.3333	39.3333	52.3333	58.6667	60.3333	66.6667	62.3333	58	64.6667	68.6667	69	154251	157035	159999	166723	169664	173083	169188	175802	178231	184339	186928	189429	193769	196298	198751
Northeast	CE	BARRO	0	0	0	0	0	0	0	0	0	0	6	9	12	8	22	34	38	0	0	0	0	0	0	0	0	2	5	9	12	14	21.3333	31.3333	88689	89001	87459	88757	89476	90188	86861	90442	90880	90320	90690	91048	92460	92732	92994
South	RS	OSORIO	0	0	0	0	0	1	1	7	3	12	14	25	26	60	97	127	136	0	0	0	0.333333	0.666667	3	3.66667	7.33333	9.66667	17	21.6667	26	61	94.6667	120	293115	299002	305131	277240	282942	288602	280014	294368	298510	341119	345379	349487	363729	367376	370810
Southeast	MG	UBA	0	0	0	0	0	0	3	5	7	2	7	21	41	96	105	91	83	0	0	0	0	1	2.66667	5	4.66667	5.33333	10	23	41	80.6667	97.3333	93	245256	248116	251099	257361	260827	264265	257676	268001	270467	269650	271806	273881	284426	286690	288861
Northeast	RN	LITORAL SUL	0	0	0	0	0	3	19	21	26	32	25	38	48	29	58	46	29	0	0	0	1	7.33333	14.3333	22	26.3333	27.6667	31.6667	37	48	45	44.3333	44.3333	114990	115970	117080	119412	120701	121981	123995	127700	129036	129077	130270	131421	139103	140470	141801
South	RS	PELOTAS	0	0	0	0	0	0	15	23	13	19	39	70	96	122	158	164	153	0	0	0	0	5	12.6667	17	18.3333	23.6667	42.6667	68.3333	96	125.333	148	158.333	478702	482769	487127	472037	476561	481048	472119	479849	482326	482915	483651	484359	501555	502736	503847
South	RS	SERRAS DE SUDESTE	0	0	0	0	0	0	3	6	2	2	10	15	17	22	29	50	34	0	0	0	0	1	3	3.66667	3.33333	4.66667	9	14	17	22.6667	33.6667	37.6667	117323	118078	118881	120569	121504	122431	115483	119079	119253	116423	116433	116439	120488	120644	120790
Northeast	MA	LITORAL OCIDENTAL MARANHENSE	0	0	0	0	3	5	17	21	17	13	25	19	44	79	64	37	74	0	0	1	2.66667	8.33333	14.3333	18.3333	17	18.3333	19	29.3333	44	62.3333	60	58.3333	175196	176506	177768	180418	181884	183340	183284	188503	189848	183749	184586	185387	186262	186768	187243
South	SC	CHAPECO	0	0	0	0	7	9	9	21	9	4	10	24	34	55	100	135	172	0	0	2.33333	5.33333	8.33333	13	13	11.3333	7.66667	12.6667	22.6667	34	63	96.6667	135.667	363410	365675	367683	371901	374235	376551	385201	399432	402987	405066	408442	411687	425546	430084	434575
Southeast	SP	ADAMANTINA	0	0	0	0	0	4	12	8	3	12	17	16	15	29	32	52	67	0	0	0	1.33333	5.33333	8	7.66667	7.66667	10.6667	15	16	15	25.3333	37.6667	50.3333	151211	151165	150998	150651	150458	150269	155300	161627	162523	158607	159159	159684	165486	166171	166840
South	SC	CURITIBANOS	0	0	0	0	1	3	1	1	4	5	3	3	6	11	32	38	45	0	0	0.333333	1.33333	1.66667	1.66667	2	3.33333	4	3.66667	4	6	16.3333	27	38.3333	117269	118176	119186	121305	123845	125048	117828	121522	121865	122626	123052	123461	126338	126895	127447
Center-West	GO	SUDOESTE DE GOIAS	0	0	0	0	0	0	14	19	31	43	46	73	80	125	145	157	154	0	0	0	0	4.66667	11	21.3333	31	40	54	66.3333	80	116.667	142.333	152	351130	356414	362004	373735	380223	386668	397142	417536	424683	446433	454273	461853	485670	494619	503397
Northeast	PE	MEDIO CAPIBARIBE	0	0	0	0	2	4	40	26	18	36	38	52	70	77	44	76	110	0	0	0.666667	2	15.3333	23.3333	28	26.6667	30.6667	42	53.3333	70	63.6667	65.6667	76.6667	252975	254761	256376	259768	261645	263509	243758	250332	250012	253176	254282	255346	258929	259022	259118
Center-West	MT	PARANATINGA	0	0	0	0	0	0	6	3	4	13	14	6	4	5	7	10	14	0	0	0	0	2	3	4.33333	6.66667	10.3333	11	8	4	5.33333	7.33333	10.3333	28656	28730	28783	28896	28958	29020	33483	34722	35318	32896	33227	33544	34079	34407	34726
Center-West	MS	NOVA ANDRADINA	0	0	0	0	10	16	38	51	57	42	39	21	18	11	25	25	36	0	0	3.33333	8.66667	21.3333	35	48.6667	50	46	34	26	18	18	20.3333	28.6667	75167	76297	77526	80104	81531	82948	84238	86969	88259	88371	89503	90595	93741	95032	96290
Southeast	SP	OURINHOS	0	0	0	0	4	7	16	20	6	20	31	40	60	87	65	87	120	0	0	1.33333	3.66667	9	14.3333	14	15.3333	19	30.3333	43.6667	60	70.6667	79.6667	90.6667	274456	277579	280780	305064	308965	312836	294395	306080	307725	289917	291403	292830	304102	305865	307576
Center-West	MT	PARECIS	0	0	0	0	1	4	1	4	0	12	8	9	19	24	24	33	34	0	0	0.333333	1.66667	2	3	1.66667	5.33333	6.66667	9.66667	12	19	22.3333	27	30.3333	65418	68142	70982	76940	80237	83511	77957	80843	82705	89344	91441	93467	96914	99190	101405
Northeast	BA	ITAPETINGA	0	0	0	0	0	0	7	14	7	9	17	15	20	37	62	55	64	0	0	0	0	2.33333	7	9.33333	10	11	13.6667	17.3333	20	39.6667	51.3333	60.3333	216000	216657	219642	229589	232854	232733	206245	212163	212174	197868	198753	199898	207788	207490	207208
Northeast	PI	MEDIO PARNAIBA PIAUIENSE	0	0	0	0	0	0	5	9	11	17	9	4	11	22	23	46	47	0	0	0	0	1.66667	4.66667	8.33333	12.3333	12.3333	10	8	11	18.6667	30.3333	38.6667	125950	126654	127365	128858	129682	130502	128905	133098	133798	130789	131234	131478	132435	132640	132824
North	PA	CASTANHAL	0	0	0	0	0	1	18	24	12	36	46	42	87	92	63	65	159	0	0	0	0.333333	6.33333	14.3333	18	24	31.3333	41.3333	58.3333	87	80.6667	73.3333	95.6667	232385	237414	242585	254317	259450	265414	260797	273359	277953	295021	300299	305405	314158	319481	324645
Southeast	RJ	VASSOURAS	0	0	0	0	0	0	19	8	16	32	23	12	7	40	38	64	44	0	0	0	0	6.33333	9	14.3333	18.6667	23.6667	22.3333	14	7	28.3333	47.3333	48.6667	152759	153566	155122	158389	160196	161990	154748	161422	162431	163707	164746	165748	166905	167634	168338
South	PR	UMUARAMA	0	0	0	0	1	3	3	4	2	8	7	17	29	32	59	81	97	0	0	0.333333	1.33333	2.33333	3.33333	3	4.66667	5.66667	10.6667	17.6667	29	40	57.3333	79	253891	251528	249003	243703	240768	237853	256295	264129	264627	265092	265648	266174	275238	276155	277040
South	PR	SAO MATEUS DO SUL	0	0	0	0	0	0	4	6	2	1	1	0	6	2	8	19	30	0	0	0	0	1.33333	3.33333	4	3	1.33333	0.666667	2.33333	6	5.33333	9.66667	19	56753	57068	57381	58037	58401	58761	60190	62742	63337	62312	62767	63207	65779	66335	66872
Northeast	PB	SERIDO ORIENTAL PARAIBANO	0	0	0	0	0	3	9	6	14	9	15	70	13	9	18	33	33	0	0	0	1	4	6	9.66667	9.66667	12.6667	31.3333	32.6667	13	13.3333	20	28	67596	68120	68634	69706	70301	70892	71059	73031	73585	73896	95659	96104	98341	98903	99446
South	RS	CRUZ ALTA	0	0	0	0	0	0	3	7	2	17	19	17	31	35	42	52	35	0	0	0	0	1	3.33333	4	8.66667	12.6667	17.6667	22.3333	31	36	43	43	156504	157048	157606	158784	159434	160080	150878	154802	154574	150223	149798	149383	154354	154223	154101
Center-West	MT	ALTO GUAPORE	0	0	0	0	0	0	10	11	8	19	18	23	20	40	14	15	31	0	0	0	0	3.33333	7	9.66667	12.6667	15	20	20.3333	20	24.6667	23	20	61201	62280	63466	65629	67002	68364	62647	64758	65247	67774	68418	69039	70085	70719	71338
North	AM	JURUA	0	0	0	0	0	2	3	5	2	4	5	5	8	13	40	38	44	0	0	0	0.666667	1.66667	3.33333	3.33333	3.66667	3.66667	4.66667	6	8	20.3333	30.3333	40.6667	115109	115783	117758	111299	113793	115888	118940	123437	125491	127845	129802	131695	139876	142338	144754
Southeast	ES	AFONSO CLAUDIO	0	0	0	0	6	2	4	10	2	12	15	21	27	37	41	44	34	0	0	2	2.66667	4	5.33333	5.33333	8	9.66667	16	21	27	35	40.6667	39.6667	126463	128014	129564	132817	134618	136407	126370	130745	131253	132069	132640	133189	141838	142777	143700
Southeast	SP	BATATAIS	0	0	0	0	0	0	10	8	4	4	9	17	19	24	16	28	49	0	0	0	0	3.33333	6	7.33333	5.33333	5.66667	10	15	19	19.6667	22.6667	31	99164	100311	101478	103923	105276	106620	101788	106374	107159	106345	107004	107638	111931	112698	113444
South	SC	JOACABA	0	0	0	0	0	3	8	5	7	11	16	12	23	44	68	106	104	0	0	0	1	3.66667	5.33333	6.66667	7.66667	11.3333	13	17	23	45	72.6667	92.6667	308603	312791	316797	325210	328500	333082	310191	320673	322199	326459	328272	330010	339181	341594	343980
Center-West	MT	ALTO PARAGUAI	0	0	0	0	0	1	4	0	1	4	1	0	5	5	7	11	8	0	0	0	0.333333	1.66667	1.66667	1.66667	1.66667	2	1.66667	2	5	5.66667	7.66667	8.66667	31730	30966	30064	28172	27124	26084	29449	30107	29793	32760	32753	32743	32717	32657	32596
Northeast	BA	ILHEUS-ITABUNA	0	0	0	0	2	7	9	13	22	51	62	83	85	195	250	336	235	0	0	0.666667	3	6	9.66667	14.6667	28.6667	45	65.3333	76.6667	85	176.667	260.333	273.667	1182857	1089177	1077935	1223516	1229383	1101016	1106024	1119423	1119081	1020642	1019213	1016864	1060853	1057086	1052837
Northeast	PI	BERTOLINIA	0	0	0	0	0	0	11	8	4	4	6	4	4	9	11	3	18	0	0	0	0	3.66667	6.33333	7.66667	5.33333	4.66667	4.66667	4.66667	4	8	7.66667	10.6667	38442	38440	38421	38382	38360	38374	40561	41722	42012	40684	40855	41017	41314	41393	41464
Center-West	MT	ARINOS	0	0	0	0	0	1	1	2	0	1	2	6	13	1	8	26	27	0	0	0	0.333333	0.666667	1.33333	1	1	1	3	7	13	7.33333	11.6667	20.3333	69745	71395	73222	79982	82099	84198	78899	81630	82711	75635	76266	76872	77897	78503	79094
North	AP	MAZAGAO	0	0	0	0	0	0	0	1	2	2	6	1	8	5	12	25	25	0	0	0	0	0	0.333333	1	1.66667	3.33333	3	5	8	8.33333	14	20.6667	51044	53012	54846	56103	60826	62940	60236	64956	66531	69402	70965	72475	76295	77979	79647
Southeast	SP	SAO JOAO DA BOA VISTA	0	0	0	0	0	7	7	7	12	16	43	64	59	42	74	113	140	0	0	0	2.33333	4.66667	7	8.66667	11.6667	23.6667	41	55.3333	59	58.3333	76.3333	109	399885	403448	407173	414995	419326	423624	399440	413843	415366	409370	410446	411486	426014	427435	428815
Northeast	PE	MATA MERIDIONAL PERNAMBUCANA	0	0	0	0	58	67	90	59	28	32	58	58	64	72	148	124	181	0	0	19.3333	41.6667	71.6667	72	59	39.6667	39.3333	49.3333	60	64	94.6667	114.667	151	508874	510935	512999	517340	519742	522127	522101	539713	543555	559290	563285	567139	584446	588547	592516
Southeast	MG	DIAMANTINA	0	0	0	0	0	0	0	0	1	0	0	0	0	4	18	19	28	0	0	0	0	0	0	0.333333	0.333333	0.333333	0	0	0	7.33333	13.6667	21.6667	81808	81896	81926	81991	82027	82063	82813	85570	85879	82707	82779	82843	85404	85536	85663
Northeast	BA	SERRINHA	0	0	0	0	1	0	16	10	21	53	41	48	59	106	110	108	111	0	0	0.333333	0.333333	5.66667	8.66667	15.6667	28	38.3333	47.3333	49.3333	59	91.6667	108	109.667	435346	371276	369946	440673	442158	364115	390547	407012	408367	400774	402763	404681	429828	432083	434211
Southeast	SP	SAO PAULO	0	6	0	0	37	93	403	642	494	941	1634	1893	2464	2897	3024	3872	4269	2	2	12.3333	43.3333	177.667	379.333	513	692.333	1023	1489.33	1997	2464	2795	3264.33	3721.67	12886203	13019177	13126022	13350324	13474450	13597629	13416928	13574264	13642870	13804831	13882809	13958229	14505939	14597964	14687396
Northeast	CE	BAIXO JAGUARIBE	0	0	0	0	16	31	47	54	27	71	90	83	88	81	86	75	83	0	0	5.33333	15.6667	31.3333	44	42.6667	50.6667	62.6667	81.3333	87	88	85	80.6667	81.3333	291040	294360	297928	305408	309551	313662	304888	316500	319281	313474	315534	317524	323140	324771	326336
South	RS	SANTA CRUZ DO SUL	0	0	0	0	0	0	6	11	5	10	23	33	42	54	82	83	88	0	0	0	0	2	5.66667	7.33333	8.66667	12.6667	22	32.6667	42	59.3333	73	84.3333	302141	305019	307997	313276	316706	320108	312397	325158	327682	320312	321938	323551	335618	337294	338870
Southeast	SP	ITAPETININGA	0	0	0	0	1	5	7	6	1	2	1	26	50	68	71	40	44	0	0	0.333333	2	4.33333	6	4.66667	3	1.33333	9.66667	25.6667	50	63	59.6667	51.6667	167321	170052	172903	178884	182196	185482	182912	193984	196902	191603	193731	195787	204817	207195	209505
South	PR	PITANGA	0	0	0	0	2	0	1	0	2	0	2	7	9	8	17	14	23	0	0	0.666667	0.666667	1	0.333333	1	0.666667	1.33333	3	6	9	11.3333	13	18	84360	84060	83690	82916	82487	82063	78540	80041	79477	75735	75037	74361	75787	75156	74548
Southeast	MG	VARGINHA	0	0	0	0	0	0	19	18	8	12	13	25	35	63	81	115	147	0	0	0	0	6.33333	12.3333	15	12.6667	11	16.6667	24.3333	35	59.6667	86.3333	114.333	413175	418252	423544	474513	481129	487691	466490	484017	487635	441060	443694	446235	462479	465344	468088
Southeast	MG	SAO LOURENCO	0	0	0	0	0	0	5	8	2	5	6	14	25	34	32	66	61	0	0	0	0	1.66667	4.33333	5	5	4.33333	8.33333	15	25	30.3333	44	53	198611	200915	203280	208240	210991	213717	204784	212115	213601	208293	209257	210185	217532	218614	219651
North	AP	MACAPA	0	0	0	0	0	0	143	186	145	135	124	130	171	156	152	147	159	0	0	0	0	47.6667	109.667	158	155.333	134.667	129.667	141.667	171	159.667	151.667	152.667	410258	425115	440566	451161	490948	508764	473740	494484	504596	546190	558042	569504	598870	611615	624241
Southeast	ES	MONTANHA	0	0	0	0	0	0	0	0	0	3	4	4	10	13	15	7	21	0	0	0	0	0	0	0	1	2.33333	3.66667	6	10	12.6667	11.6667	14.3333	50766	50741	50738	50734	50730	50728	53343	55454	55887	54378	54658	54929	58571	59014	59447
South	SC	JOINVILLE	0	0	0	0	6	7	25	25	29	40	43	51	110	128	214	221	241	0	0	2	4.33333	12.6667	19	26.3333	31.3333	37.3333	44.6667	68	110	150.667	187.667	225.333	696902	711092	725838	756798	773931	790936	777077	795570	806809	842709	855256	867387	908571	925643	942558
North	TO	MIRACEMA DO TOCANTINS	0	0	0	0	0	0	6	10	4	6	10	8	15	9	22	33	50	0	0	0	0	2	5.33333	6.66667	6.66667	6.66667	8	11	15	15.3333	21.3333	35	137622	138796	140043	141789	144102	145535	137831	141133	141523	142293	142782	143238	147591	148107	148608
Northeast	CE	CANINDE	0	0	0	0	0	0	5	7	8	9	27	27	28	20	14	25	52	0	0	0	0	1.66667	4	6.66667	8	14.6667	21	27.3333	28	20.6667	19.6667	30.3333	113282	114484	115769	118466	119959	121441	121046	126395	127790	124695	125692	126657	129053	129858	130632
South	SC	FLORIANOPOLIS	0	0	0	0	1	2	16	13	6	10	27	27	58	141	203	233	252	0	0	0.333333	1	6.33333	10.3333	11.6667	9.66667	14.3333	21.3333	37.3333	58	134	192.333	229.333	730719	747474	764907	801471	822530	842627	818025	836139	848224	878260	891126	903568	946036	963534	980878
Southeast	MG	BARBACENA	0	0	0	0	0	0	3	7	4	5	10	16	17	25	51	36	76	0	0	0	0	1	3.33333	4.66667	5.33333	6.33333	10.3333	14.3333	17	31	37.3333	54.3333	207972	209655	211483	215323	217447	219556	212981	224882	226651	221989	223244	224453	232546	233915	235232
Northeast	MA	ITAPECURU MIRIM	0	0	0	0	0	0	2	0	17	25	29	23	39	45	37	69	54	0	0	0	0	0.666667	0.666667	6.33333	14	23.6667	25.6667	30.3333	39	40.3333	50.3333	53.3333	153479	160250	161033	162669	163576	164473	179642	185416	188011	210753	214763	218636	223241	226672	229914
North	TO	DIANOPOLIS	1	0	0	0	0	2	12	7	14	14	4	20	11	18	24	29	32	0.333333	0	0	0.666667	4.66667	7	11	11.6667	10.6667	12.6667	11.6667	11	17.6667	23.6667	28.3333	112821	113936	114759	115909	117431	118377	117265	120404	121144	118110	118576	119017	122716	123210	123693
Southeast	SP	REGISTRO	0	0	0	0	1	7	9	7	4	4	8	10	22	39	40	65	66	0	0	0.333333	2.66667	5.66667	7.66667	6.66667	5	5.33333	7.33333	13.3333	22	33.6667	48	57	246320	250524	254038	290673	295170	299635	270326	279095	279745	243592	243647	243694	251532	251755	251972
Southeast	MG	FORMIGA	0	0	0	0	0	6	3	6	3	1	1	3	13	15	35	37	36	0	0	0	2	3	5	4	3.33333	1.66667	1.66667	5.66667	13	21	29	36	146172	147261	148319	153399	154727	156041	151443	156915	157753	152171	152726	153262	158464	159114	159741
South	PR	PATO BRANCO	0	0	0	0	3	10	20	2	6	9	3	3	17	15	30	29	55	0	0	1	4.33333	11	10.6667	9.33333	5.66667	6	5	7.66667	17	20.6667	24.6667	38	151156	151638	152084	153024	153544	154058	152471	157566	158135	159424	160101	160750	166665	167576	168455
Center-West	GO	PORANGATU	0	0	0	0	0	0	13	21	19	16	31	15	50	39	47	55	60	0	0	0	0	4.33333	11.3333	17.6667	18.6667	22	20.6667	32	50	45.3333	47	54	224697	223577	222210	219354	217770	216200	220122	226916	226752	231426	231812	232179	239198	239814	240420
Southeast	SP	SANTOS	0	0	0	0	6	19	29	31	35	64	121	148	164	184	250	382	432	0	0	2	8.33333	18	26.3333	31.6667	43.3333	73.3333	111	144.333	164	199.333	272	354.667	1340030	1359494	1378625	1418784	1441010	1463067	1430728	1465494	1479317	1471013	1482740	1494079	1557125	1570532	1583560
Northeast	CE	BATURITE	0	0	0	0	2	2	3	6	11	21	17	53	29	46	46	39	42	0	0	0.666667	1.33333	2.33333	3.66667	6.66667	12.6667	16.3333	30.3333	33	29	40.3333	43.6667	42.3333	173783	175211	176836	180248	182137	184010	177284	186158	187479	186943	188119	189249	192546	193466	194349
Southeast	SP	ITAPEVA	0	0	0	0	0	3	12	11	2	26	19	48	54	72	45	50	69	0	0	0	1	5	8.66667	8.33333	13	15.6667	31	40.3333	54	57	55.6667	54.6667	235566	237815	240107	244924	247588	250235	237529	247073	248314	240465	241054	241618	250088	250874	251637
South	PR	GOIOERE	0	0	0	0	0	7	0	5	0	2	5	2	3	11	17	29	28	0	0	0	2.33333	2.33333	4	1.66667	2.33333	2.33333	3	3.33333	3	10.3333	19	24.6667	126333	124234	121787	116655	113818	110999	118480	120465	119427	116751	115778	114831	117164	116297	115459
Northeast	AL	ALAGOANA DO SERTAO DO SAO FRANCISCO	0	0	0	0	0	2	12	7	7	10	6	8	20	6	18	22	16	0	0	0	0.666667	4.66667	7	8.66667	8	7.66667	8	11.3333	20	14.6667	15.3333	18.6667	71060	71740	72518	74153	75057	75955	78648	81030	82086	79632	80373	81088	84669	85317	86245
Southeast	MG	POUSO ALEGRE	0	0	0	0	0	0	11	4	4	15	11	5	14	21	57	72	101	0	0	0	0	3.66667	5	6.33333	7.66667	10	10.3333	10	14	30.6667	50	76.6667	287740	292625	297759	308079	313977	319828	304656	317156	320547	326425	329877	333209	346933	350481	353879
Southeast	MG	AIMORES	0	0	0	0	0	0	2	2	0	10	20	15	19	22	25	23	51	0	0	0	0	0.666667	1.33333	1.33333	4	10	15	18	19	22	23.3333	33	147421	146885	146255	144935	144205	143478	146387	150741	150865	149404	149500	149587	154177	154384	154582
Northeast	AL	SERRANA DO SERTAO ALAGOANO	0	0	0	0	0	1	11	2	3	11	12	14	10	10	5	27	27	0	0	0	0.333333	4	4.66667	5.33333	5.33333	8.66667	12.3333	12	10	8.33333	14	19.6667	87869	89389	89626	90123	90398	90671	89012	92148	92400	89487	89532	89571	92964	93456	93222
Northeast	MA	BAIXO PARNAIBA MARANHENSE	0	0	0	0	0	0	0	3	2	5	4	14	3	9	38	27	26	0	0	0	0	0	1	1.66667	3.33333	3.66667	7.66667	7	3	16.6667	24.6667	30.3333	122989	124326	120477	124711	127056	129381	127890	132044	133770	139001	140915	141956	139621	141167	142624
South	PR	LONDRINA	0	0	0	0	9	1	5	7	7	29	34	51	75	124	143	196	159	0	0	3	3.33333	5	4.33333	6.33333	14.3333	23.3333	38	53.3333	75	114	154.333	166	650635	659158	668538	688230	699127	709944	703030	718740	726301	724570	731145	737502	769182	776988	784520
Southeast	MG	JUIZ DE FORA	0	0	0	0	0	1	22	32	20	26	33	34	57	71	152	162	171	0	0	0	0.333333	7.66667	18.3333	24.6667	26	26.3333	31	41.3333	57	93.3333	128.333	161.667	673745	681359	689284	705926	715134	724273	724368	738608	745584	728602	733557	738328	765848	771143	776228
South	PR	TOLEDO	0	0	0	0	1	6	13	16	10	19	29	23	36	54	66	80	107	0	0	0.333333	2.33333	6.66667	11.6667	13	15	19.3333	23.6667	29.3333	36	52	66.6667	84.3333	342248	342177	342049	341189	340638	340095	359409	373201	375903	377780	380409	382940	398350	401577	404688
South	SC	ITAJAI	0	0	0	0	9	14	38	31	16	48	40	40	61	93	149	147	128	0	0	3	7.66667	20.3333	27.6667	28.3333	31.6667	34.6667	42.6667	47	61	101	129.667	141.333	420037	431758	444243	472400	486755	501004	494421	518291	529218	570947	583702	596034	633350	650754	667998
South	PR	JACAREZINHO	0	0	0	0	0	1	0	0	0	0	0	3	19	28	30	25	24	0	0	0	0.333333	0.333333	0.333333	0	0	0	1	7.33333	19	25.6667	27.6667	26.3333	119527	119577	119568	123494	123596	123698	123563	127557	127907	122552	122782	123002	127155	127552	127938
North	PA	BELEM	0	0	0	0	9	4	33	45	39	95	92	106	85	189	517	545	338	0	0	3	4.33333	15.3333	27.3333	39	59.6667	75.3333	97.6667	94.3333	85	263.667	417	466.667	1908700	1945403	1985586	2076747	2116650	2162977	2128109	2168314	2198188	2142276	2164037	2185084	2222335	2242436	2261942
North	PA	MARABA	0	0	0	0	0	2	38	43	47	31	62	52	51	62	58	76	62	0	0	0	0.666667	13.3333	27.6667	42.6667	40.3333	46.6667	48.3333	55	51	57	65.3333	65.3333	222211	227873	233717	246975	252776	259514	243835	248800	252024	284746	290079	295238	304066	309469	314713
Northeast	RN	PAU DOS FERROS	0	0	0	0	0	2	4	5	5	9	4	11	8	23	19	23	31	0	0	0	0.666667	2	3.66667	4.66667	6.33333	6	8	7.66667	8	16.6667	21.6667	24.3333	112813	113433	113937	114991	115578	116160	112253	115517	115739	114267	114843	115390	127911	128258	128595
Northeast	PE	ARARIPINA	0	0	0	0	0	5	5	9	3	6	29	30	32	36	56	59	86	0	0	0	1.66667	3.33333	6.33333	5.66667	6	12.6667	21.6667	30.3333	32	41.3333	50.3333	67	280201	282610	285047	290161	292992	295800	298440	310427	313547	307642	309972	312105	321819	324218	326540
North	RO	COLORADO DO OESTE	0	0	0	0	0	0	0	0	1	6	3	2	0	3	6	7	20	0	0	0	0	0	0	0.333333	2.33333	3.33333	3.66667	1.66667	0	3	5.33333	11	59768	59013	58277	55031	55871	55020	52400	53965	53234	53031	52452	51890	55202	54808	54424
Northeast	SE	BAIXO COTINGUIBA	0	0	0	0	1	4	9	4	2	8	9	20	38	22	21	19	20	0	0	0.333333	1.66667	4.66667	5.66667	5	4.66667	6.33333	12.3333	22.3333	38	27	20.6667	20	78078	79085	80112	82265	83456	84639	83012	85569	86384	89663	90666	91631	95386	96485	97556
Southeast	ES	ALEGRE	0	0	0	0	1	0	1	2	0	3	0	12	16	20	32	22	50	0	0	0.333333	0.333333	0.666667	1	1	1.66667	1	5	9.33333	16	22.6667	24.6667	34.6667	154319	155978	157459	160570	162288	163999	149931	154221	154231	158303	158732	159140	169038	169852	170649
Southeast	SP	RIBEIRAO PRETO	0	0	0	0	2	14	44	34	29	60	93	128	153	196	214	250	232	0	0	0.666667	5.33333	20	30.6667	35.6667	41	60.6667	93.6667	124.667	153	187.667	220	232	857350	869398	882875	911170	926828	942373	919179	952520	963197	1032547	1045507	1058037	1108766	1123155	1137140
Southeast	MG	VICOSA	0	0	0	0	0	0	1	3	2	1	5	12	10	19	50	31	58	0	0	0	0	0.333333	1.33333	2	2	2.66667	6	9	10	26.3333	33.3333	46.3333	217284	218714	220280	244170	246191	248198	242545	251206	252644	221585	222077	222542	229741	230383	230993
Southeast	RJ	VALE DO PARAIBA FLUMINENSE	0	0	0	0	6	27	39	9	20	54	67	102	138	125	167	158	96	0	0	2	11	24	25	22.6667	27.6667	47	74.3333	102.333	138	143.333	150	140.333	631596	638527	645850	689425	699703	709905	724978	766416	778422	680011	684411	688661	693577	696691	699699
Southeast	ES	LINHARES	0	0	0	0	1	2	6	4	4	20	22	15	27	35	70	67	79	0	0	0.333333	1	3	4	4.66667	9.33333	15.3333	19	21.3333	27	44	57.3333	72	254413	258002	261576	269079	273232	277354	276315	290258	294106	308523	312995	317319	343281	349310	355230
Southeast	SP	MARILIA	0	0	0	0	0	2	7	6	5	3	5	8	26	51	54	70	86	0	0	0	0.666667	3	5	6	4.66667	4.33333	5.33333	13	26	43.6667	58.3333	70	314123	317750	321512	329407	333776	338113	328394	336847	339341	330285	331875	333406	346116	348022	349874
Center-West	MS	AQUIDAUANA	0	0	0	0	3	10	5	4	14	13	11	11	36	18	19	14	33	0	0	1	4.33333	6	6.33333	7.66667	10.3333	12.6667	11.6667	19.3333	36	24.3333	17	22	99375	100374	101356	103417	104556	105688	99648	103587	104043	105407	105957	106489	108827	109410	109979
South	SC	TIJUCAS	0	0	0	0	1	1	1	0	1	3	3	6	6	9	19	18	27	0	0	0.333333	0.666667	1	0.666667	0.666667	1.33333	2.33333	4	5	6	11.3333	15.3333	21.3333	70517	71106	71676	60339	60816	61290	64007	66442	67232	91907	93601	95238	100444	102749	105033
Southeast	MG	ALMENARA	0	0	0	0	0	1	2	1	3	6	3	7	17	28	34	38	40	0	0	0	0.333333	1	1.33333	2	3.33333	4	5.33333	9	17	26.3333	33.3333	37.3333	172680	173328	173650	184568	185026	185477	186477	192294	193127	179658	180205	180728	186741	187400	188033
Northeast	BA	JEQUIE	0	0	0	0	3	2	11	19	14	35	51	50	77	115	86	107	126	0	0	1	1.66667	5.33333	10.6667	14.6667	22.6667	33.3333	45.3333	59.3333	77	92.6667	102.667	106.333	524790	520488	522703	533363	535619	532441	513850	531173	532286	507347	508429	509608	537105	536988	537271
Northeast	CE	SERTAO DE QUIXERAMOBIM	0	0	0	0	0	0	1	2	1	3	6	20	19	26	53	51	63	0	0	0	0	0.333333	1	1.33333	2	3.33333	9.66667	15	19	32.6667	43.3333	55.6667	236443	238337	240025	243566	245525	247472	256993	270488	273006	266167	268586	270921	276305	278280	280176
Center-West	MT	SINOP	0	0	0	0	4	4	1	1	3	22	24	9	18	34	39	25	51	0	0	1.33333	2.66667	3	2	1.66667	8.66667	16.3333	18.3333	17	18	30.3333	32.6667	38.3333	138713	144224	150030	162219	169332	176041	166305	173010	177068	173189	176354	179412	184603	187978	191263
Southeast	SP	JABOTICABAL	0	0	0	0	1	1	9	10	5	11	14	31	46	71	74	81	99	0	0	0.333333	0.666667	3.66667	6.66667	8	8.66667	10	18.6667	30.3333	46	63.6667	75.3333	84.6667	390699	394172	398040	406165	410657	415120	395975	412290	414643	408199	409923	411585	426962	429062	431105
North	PA	ARARI	0	0	0	0	0	0	3	9	12	9	26	45	21	27	36	25	39	0	0	0	0	1	4	8	10	15.6667	26.6667	30.6667	21	28	29.3333	33.3333	119646	120563	121929	125024	126376	127950	135989	142376	144793	152990	155707	158333	162836	165571	168225
South	PR	FOZ DO IGUACU	0	0	0	0	0	0	5	4	2	4	9	23	27	38	58	90	102	0	0	0	0	1.66667	3	3.66667	3.33333	5	12	19.6667	27	41	62	83.3333	409389	416776	424801	441646	450969	460220	457510	470799	477707	408800	409521	410212	424020	425301	426541
Center-West	MT	JAURU	0	0	0	0	0	1	6	3	7	9	11	15	15	17	10	15	37	0	0	0	0.333333	2.33333	3.33333	5.33333	6.33333	9	11.6667	13.6667	15	14	14	20.6667	105104	103654	102819	101525	100565	99617	104820	107665	107756	107434	107562	107679	107853	107828	107801
North	AM	ITACOATIARA	0	0	0	0	0	0	15	26	12	18	17	25	25	21	30	26	44	0	0	0	0	5	13.6667	17.6667	18.6667	15.6667	20	22.3333	25	25.3333	25.6667	33.3333	125492	128021	130264	134063	137101	139654	146994	154218	157269	152027	154243	156384	165918	168711	171452
Northeast	RN	SERRA DE SAO MIGUEL	0	0	0	0	0	0	3	4	1	3	1	4	5	6	8	10	20	0	0	0	0	1	2.33333	2.66667	2.66667	1.66667	2.66667	3.33333	5	6.33333	8	12.6667	59028	59372	59742	60515	60944	61370	62843	64765	65343	62755	63082	63390	46579	46871	47158
Northeast	BA	BOM JESUS DA LAPA	0	0	0	0	0	0	5	5	9	4	15	16	29	21	26	42	37	0	0	0	0	1.66667	3.33333	6.33333	6	9.33333	11.6667	20	29	25.3333	29.6667	35	630308	162714	163995	665212	675384	169605	169247	176339	177864	171236	172123	172975	182438	183427	184362
Southeast	SP	DRACENA	0	0	0	0	0	3	3	4	2	3	3	6	6	9	18	21	31	0	0	0	1	2	3.33333	3	3	2.66667	4	5	6	11	16	23.3333	108053	108126	108161	108234	108276	108316	111496	117442	118306	116149	116777	117378	121934	122671	123389
Northeast	PB	SERRA DO TEIXEIRA	0	0	0	0	0	0	8	2	7	15	18	12	53	44	37	10	24	0	0	0	0	2.66667	3.33333	5.66667	8	13.3333	15	27.6667	53	44.6667	30.3333	23.6667	108396	108567	108726	109057	109571	109759	113815	117242	118032	115888	120992	120867	123763	124525	125256
South	RS	CAMPANHA CENTRAL	0	0	0	0	0	0	1	3	4	12	9	24	20	24	35	28	43	0	0	0	0	0.333333	1.33333	2.66667	6.33333	8.33333	15	17.6667	20	26.3333	29	35.3333	195749	197239	198670	201673	203335	204984	184449	188179	187397	184948	184243	183559	189590	189297	189021
Southeast	ES	NOVA VENECIA	0	0	0	0	0	0	4	7	2	3	7	10	4	8	17	23	36	0	0	0	0	1.33333	3.66667	4.33333	4	4	6.66667	7	4	9.66667	16	25.3333	115960	116697	117444	119013	119882	120744	117347	122140	122754	124110	124805	125475	133896	134971	136030
South	PR	MARINGA	0	0	0	0	3	4	3	5	2	2	13	8	53	83	99	126	108	0	0	1	2.33333	3.33333	4	3.33333	3	5.66667	7.66667	24.6667	53	78.3333	102.667	111	461658	469821	478585	496986	507168	517275	502270	515381	521544	540477	547350	554000	580303	588178	595781
Southeast	SP	ITANHAEM	0	0	0	0	0	3	1	8	9	14	18	20	37	33	28	33	74	0	0	0	1	1.33333	4	6	10.3333	13.6667	17.3333	25	37	32.6667	31.3333	45	189047	194816	201068	214194	221457	228667	200222	212623	215649	218798	221676	224456	235384	238570	241666
Southeast	MG	FRUTAL	0	0	0	0	5	5	14	4	7	13	11	12	10	13	20	23	65	0	0	1.66667	3.33333	8	7.66667	8.33333	8	10.3333	12	11	10	14.3333	18.6667	36	155171	156223	157157	159120	160208	161284	172140	179948	182433	179512	181462	183338	190941	192936	194851
Northeast	AL	BATALHA	0	0	0	0	0	5	12	5	2	5	5	3	6	13	17	11	25	0	0	0	1.66667	5.66667	7.33333	6.33333	4	4	4.33333	4.66667	6	12	13.6667	17.6667	88932	89770	90690	92614	93680	94739	91640	94144	94713	92320	92668	92444	96367	96699	97012
Southeast	SP	PIRACICABA	0	0	0	0	0	6	9	16	7	30	44	65	86	97	102	98	128	0	0	0	2	5	10.3333	10.6667	17.6667	27	46.3333	65	86	95	99	109.333	501219	509843	517761	692233	704336	716344	693678	712958	720076	556085	560951	565651	590064	595583	600947
Southeast	SP	SAO JOSE DO RIO PRETO	0	0	0	0	0	0	27	29	15	43	51	70	82	102	134	142	175	0	0	0	0	9	18.6667	23.6667	29	36.3333	54.6667	67.6667	82	106	126	150.333	684117	696277	708159	733105	746909	760615	736194	764961	773970	763534	770674	777572	811709	819766	827593
Southeast	MG	CONCEICAO DO MATO DENTRO	0	0	0	0	0	0	2	0	0	5	0	2	4	10	10	9	27	0	0	0	0	0.666667	0.666667	0.666667	1.66667	1.66667	2.33333	2	4	8	9.66667	15.3333	88491	88474	88436	84887	84815	84742	83806	86150	86172	84605	84328	84048	86263	86060	85868
Southeast	SP	ITUVERAVA	0	0	0	0	0	3	1	7	6	8	6	3	15	7	14	14	26	0	0	0	1	1.33333	3.66667	4.66667	7	6.66667	5.66667	8	15	12	11.6667	18	90779	91649	92625	94675	95809	96935	92980	97004	97684	95710	96186	96644	100345	100912	101463
Southeast	RJ	BACIA DE SAO JOAO	0	0	0	0	0	0	1	0	0	1	5	6	15	30	31	48	26	0	0	0	0	0.333333	0.333333	0.333333	0.333333	2	4	8.66667	15	25.3333	36.3333	35	83506	85696	88415	100385	101994	103591	100394	106565	107853	162372	168708	174836	182054	187921	193588
Northeast	CE	CHAPADA DO ARARIPE	0	0	0	0	0	1	4	4	4	6	10	15	7	3	17	17	18	0	0	0	0.333333	1.66667	3	4	4.66667	6.66667	10.3333	10.6667	7	9	12.3333	17.3333	90032	90805	91589	93234	94143	95047	94128	97548	98329	95365	95823	96261	97815	98157	98489
South	PR	APUCARANA	0	0	0	0	0	2	5	4	0	1	1	6	33	41	52	66	46	0	0	0	0.666667	2.33333	3.66667	3	1.66667	0.666667	2.66667	13.3333	33	42	53	54.6667	255598	258849	262439	269970	274140	278277	270255	282504	285476	286984	289743	292405	305150	308397	311533
South	SC	CRICIUMA	0	0	0	0	0	2	2	3	3	2	10	11	17	31	55	81	74	0	0	0	0.666667	1.33333	2.33333	2.66667	2.66667	5	7.66667	12.6667	17	34.3333	55.6667	70	330309	334591	339163	348757	354066	359334	351232	359564	362890	369398	372783	376053	389413	393988	398519
Northeast	BA	BRUMADO	0	0	0	0	1	1	2	0	9	4	6	9	21	20	33	49	44	0	0	0.333333	0.666667	1.33333	1	3.66667	4.33333	6.33333	6.33333	12	21	24.6667	34	42	217897	266927	264283	225920	228308	270675	235189	240771	240423	235970	234473	233819	245277	244234	230079
South	PR	CIANORTE	0	0	0	0	2	0	2	1	1	9	5	10	12	19	20	30	31	0	0	0.666667	0.666667	1.33333	1	1.33333	3.66667	5	8	9	12	17	23	27	125932	126571	127198	128516	129246	129971	135123	140930	142420	142433	143758	145037	151299	152865	154374
Northeast	BA	IRECE	0	0	0	0	0	0	10	15	17	24	35	40	77	96	86	55	70	0	0	0	0	3.33333	8.33333	14	18.6667	25.3333	33	50.6667	77	86.3333	79	70.3333	357649	354084	354945	364344	365525	357242	373807	388421	391940	373298	375044	376724	400033	402131	404025
Northeast	SE	SERGIPANA DO SERTAO DO SAO FRANCISCO	0	0	0	0	5	13	26	11	19	32	60	44	40	28	22	27	39	0	0	1.66667	6	14.6667	16.6667	18.6667	20.6667	37	45.3333	48	40	30	25.6667	29.3333	137687	139689	141839	141200	143601	145982	141825	146206	147707	156182	157807	159376	165747	167528	169269
South	RS	CAMPANHA MERIDIONAL	0	0	0	0	0	0	2	5	4	10	9	7	13	12	33	31	29	0	0	0	0	0.666667	2.33333	3.66667	6.33333	7.66667	8.66667	9.66667	13	19.3333	25.3333	31	173811	174811	175816	177926	179093	180252	169078	173749	173706	173808	173898	173987	180078	180372	180648
North	PA	REDENCAO	0	0	0	0	0	2	19	29	21	37	50	32	32	43	25	31	42	0	0	0	0.666667	7	16.6667	23	29	36	39.6667	38	32	33.3333	33	32.6667	166141	166815	166632	166221	166040	165831	169250	174710	175328	183190	184420	185608	187783	188791	189772
Southeast	MG	ANDRELANDIA	0	0	0	0	0	0	1	1	4	1	2	0	4	8	4	9	26	0	0	0	0	0.333333	0.666667	2	2	2.33333	1	2	4	5.33333	7	13	73749	74047	74370	75046	75420	75791	72536	74416	74458	73870	73899	73921	76164	76246	76325
Southeast	SP	SAO JOSE DOS CAMPOS	0	0	0	0	0	6	42	43	25	54	61	55	80	144	217	255	319	0	0	0	2	16	30.3333	36.6667	40.6667	46.6667	56.6667	65.3333	80	147	205.333	263.667	1257394	1276721	1296990	1339537	1363085	1386456	1344260	1381846	1395905	1415146	1429126	1442646	1506997	1522740	1538038
North	AM	RIO PRETO DA EVA	0	0	2	0	0	6	12	13	6	16	12	9	8	7	8	7	18	0.666667	0.666667	0.666667	2	6	10.3333	10.3333	11.6667	11.3333	12.3333	9.66667	8	7.66667	7.33333	11	40307	39472	41559	45093	47919	50294	49218	51478	53129	52894	54270	55600	59977	61674	63342
Southeast	SP	FRANCO DA ROCHA	0	0	0	0	1	3	7	7	4	18	15	27	18	16	38	80	140	0	0	0.333333	1.33333	3.66667	5.66667	6	9.66667	12.3333	20	20	18	24	44.6667	86	386951	399443	411628	437204	451359	465408	422042	448669	456027	453561	459731	465698	488640	495465	502101
Southeast	SP	PRESIDENTE PRUDENTE	0	0	0	0	4	7	6	10	8	31	18	20	25	58	88	101	118	0	0	1.33333	3.66667	5.66667	7.66667	8	16.3333	19	23	21	25	57	82.3333	102.333	556454	561438	566817	580031	586339	592598	568577	586016	589043	573368	575620	577785	599146	601915	604601
South	PR	CAMPO MOURAO	0	0	0	0	2	1	3	2	1	1	7	11	18	27	28	39	46	0	0	0.666667	1	2	2	2	1.33333	3	6.33333	12	18	24.3333	31.3333	37.6667	215084	213832	212291	209059	207268	205493	212823	218856	218837	217374	217399	217415	224261	224566	224861
Northeast	BA	ITABERABA	0	0	0	0	0	1	4	11	8	17	15	15	30	19	37	58	37	0	0	0	0.333333	1.66667	5.33333	7.66667	12	13.3333	15.6667	20	30	28.6667	38	44	283698	247215	246992	284729	284956	246024	250940	258977	259906	249359	249459	249549	264041	264253	264568
North	PA	ALTAMIRA	0	0	0	0	1	0	34	37	14	57	66	51	61	45	50	26	72	0	0	0.333333	0.333333	11.6667	23.6667	28.3333	36	45.6667	58	59.3333	61	52	40.3333	49.3333	229706	232425	235237	241613	244402	247642	250338	259288	228658	273880	277530	265594	287193	290730	294165
South	RS	RESTINGA SECA	0	0	0	0	0	0	0	1	0	2	0	2	4	12	12	8	12	0	0	0	0	0	0.333333	0.333333	1	0.666667	1.33333	2	4	9.33333	10.6667	10.6667	66619	66923	67203	67792	68118	68442	63343	64812	64598	63240	63008	62779	64841	64744	64652
Southeast	MG	TRES MARIAS	0	0	0	0	0	0	2	1	1	0	2	6	10	22	21	14	16	0	0	0	0	0.666667	1	1.33333	0.666667	1	2.66667	6	10	17.6667	19	17	89669	90698	91659	93676	94792	95900	93954	97652	98493	96839	97472	98083	101708	102388	103040
Northeast	BA	GUANAMBI	0	0	0	0	0	3	4	14	11	6	15	20	27	43	63	66	71	0	0	0	1	2.33333	7	9.66667	10.3333	10.6667	13.6667	20.6667	27	44.3333	57.3333	66.6667	334108	357049	358536	338688	339855	365073	368049	380175	382715	371379	372781	374180	401741	403473	405109
Northeast	PE	VALE DO IPANEMA	0	0	0	0	0	1	19	11	1	31	22	12	19	39	17	29	49	0	0	0	0.333333	6.66667	10.3333	10.3333	14.3333	18	21.6667	17.6667	19	25	28.3333	31.6667	162648	163729	164477	166048	166918	167781	169600	175841	177095	180017	181394	183103	188822	190105	192226
South	RS	IJUI	0	0	0	0	0	0	5	5	2	1	5	5	4	12	25	28	41	0	0	0	0	1.66667	3.33333	4	2.66667	2.66667	3.66667	4.66667	4	13.6667	21.6667	31.3333	180391	180900	181424	182529	183142	183746	180635	186632	187169	183920	184247	184556	191123	191605	192056
Center-West	MT	ARIPUANA	0	0	0	0	2	2	1	16	11	14	8	7	20	18	19	18	40	0	0	0.666667	1.33333	1.66667	6.33333	9.33333	13.6667	11	9.66667	11.6667	20	19	18.3333	25.6667	100213	102650	105224	110628	113619	116588	133121	138842	143008	137668	140785	143796	148922	152295	155581
South	PR	CAPANEMA	0	0	0	0	0	0	0	0	2	0	1	1	1	1	10	10	28	0	0	0	0	0	0	0.666667	0.666667	1	0.666667	1	1	4	7	16	93301	92919	92494	91601	91107	90618	93142	95878	96003	95292	95410	95516	98658	98899	99132
South	SC	ARARANGUA	0	0	0	0	3	4	10	2	4	6	15	11	23	19	17	41	37	0	0	1	2.33333	5.66667	5.33333	5.33333	4	8.33333	10.6667	16.3333	23	19.6667	25.6667	31.6667	162664	164614	166675	179882	182455	185009	183714	190978	193143	180808	182397	183931	190312	192455	194578
Southeast	SP	BAURU	0	0	0	0	1	7	5	14	8	13	23	69	59	83	78	86	126	0	0	0.333333	2.66667	4.33333	8.66667	9	11.6667	14.6667	35	50.3333	59	73.3333	82.3333	96.6667	522632	529143	536341	551454	559817	568117	559417	578243	584366	561705	565405	568973	591960	596251	600419
Northeast	RN	SERIDO ORIENTAL	0	0	0	0	0	3	6	5	5	17	18	16	21	27	23	20	17	0	0	0	1	3	4.66667	5.33333	9	13.3333	17	18.3333	21	23.6667	23.3333	20	115072	115523	115981	116942	117475	118004	117151	120584	121097	118828	119162	119481	143233	143731	143972
Southeast	MG	ALFENAS	0	0	0	0	0	0	0	4	3	8	7	11	17	25	27	34	54	0	0	0	0	0	1.33333	2.33333	5	6	8.66667	11.6667	17	23	28.6667	38.3333	212176	214892	217759	223776	227105	230411	218793	226963	228634	225356	226640	227873	236101	237500	238847
Northeast	RN	MACAU	0	0	0	0	1	1	1	1	1	0	2	0	6	4	7	7	14	0	0	0.333333	0.666667	1	1	1	0.666667	1	0.666667	2.66667	6	5.66667	6	9.33333	45144	45375	45625	46150	46441	46729	50925	52544	53289	52508	53133	53735	76866	78084	78987
Center-West	GO	SAO MIGUEL DO ARAGUAIA	0	0	0	0	0	0	1	2	4	3	8	4	9	9	11	11	16	0	0	0	0	0.333333	1	2.33333	3	5	5	7	9	9.66667	10.3333	12.6667	74377	74690	74870	75253	75465	75676	76691	79369	79822	76701	76889	77067	79478	79749	80013
Northeast	BA	EUCLIDES DA CUNHA	0	0	0	0	0	0	2	7	3	10	19	19	31	38	50	51	47	0	0	0	0	0.666667	3	4	6.66667	10.6667	16	23	31	39.6667	46.3333	49.3333	306918	297814	299644	316343	319058	307664	295578	305669	306609	298180	298672	299146	316859	317665	227413
Southeast	SP	MOJI DAS CRUZES	0	0	0	0	4	7	17	22	17	30	68	68	76	144	222	243	219	0	0	1.33333	3.66667	9.33333	15.3333	18.6667	23	38.3333	55.3333	70.6667	76	147.333	203	228	958121	984026	1011442	1068996	1100847	1363322	1308633	1360842	1383254	1316402	1330640	1344408	1405959	1421902	1437397
South	RS	CACHOEIRA DO South	0	0	0	0	0	0	0	0	2	0	0	2	2	12	25	20	28	0	0	0	0	0	0	0.666667	0.666667	0.666667	0.666667	1.33333	2	13	19	24.3333	157817	158286	158757	159746	160291	160835	153855	157985	157916	152969	152643	152323	157451	157401	157353
Northeast	MA	ROSARIO	0	0	0	0	0	15	24	19	14	19	10	5	10	12	15	24	41	0	0	0	5	13	19.3333	19	17.3333	14.3333	11.3333	8.33333	10	12.3333	17	26.6667	134356	132732	134205	137292	139000	140697	159782	164929	168417	161189	163620	165969	168740	170773	172687
South	PR	TELEMACO BORBA	0	0	0	0	0	3	4	3	0	10	6	9	12	13	22	14	42	0	0	0	1	2.33333	3.33333	2.33333	4.33333	5.33333	8.33333	9	12	15.6667	16.3333	26	146951	147637	148227	149469	150156	150837	154548	160790	162128	158999	159972	160909	167218	168444	169619
Southeast	MG	MANTENA	0	0	0	0	0	0	0	0	1	3	0	1	3	0	12	4	14	0	0	0	0	0	0	0.333333	1.33333	1.33333	1.33333	1.33333	3	5	5.33333	10	61342	61041	60654	63927	63480	63035	65139	67001	67048	63208	63315	63414	65428	65577	65720
Southeast	MG	CATAGUASES	0	0	0	0	0	3	9	2	2	12	15	14	8	18	14	40	49	0	0	0	1	4	4.66667	4.33333	5.33333	9.66667	13.6667	12.3333	8	13.3333	24	34.3333	208933	210291	211641	215165	216684	218188	212139	219325	220262	216590	217305	217985	225298	226150	226963
Northeast	PE	BREJO PERNAMBUCANO	0	0	0	0	21	27	28	21	6	6	5	6	14	24	22	25	53	0	0	7	16	25.3333	25.3333	18.3333	11	5.66667	5.66667	8.33333	14	20	23.6667	33.3333	211712	213093	213944	215732	216721	217704	217228	223634	223796	216390	216861	217310	222423	222853	223270
Southeast	MG	PASSOS	0	0	0	0	0	1	3	7	5	9	9	3	13	20	25	31	50	0	0	0	0.333333	1.33333	3.66667	5	7	7.66667	7	8.33333	13	19.3333	25.3333	35.3333	212920	215441	217855	220767	223507	226230	216734	224627	226099	226412	227661	228862	237077	238443	239757
South	PR	CASCAVEL	0	0	0	0	0	2	4	2	4	2	15	11	16	30	31	94	80	0	0	0	0.666667	2	2.66667	3.33333	2.66667	7	9.33333	14	16	25.6667	51.6667	68.3333	402729	407144	411452	420124	425317	430475	430430	440055	444124	432978	435869	438658	456161	459734	463188
Southeast	SP	SAO CARLOS	0	0	0	0	1	0	6	6	19	24	37	35	38	55	52	41	55	0	0	0.333333	0.333333	2.33333	4	10.3333	16.3333	26.6667	32	36.6667	38	48.3333	49.3333	49.3333	277636	281898	286578	289353	294723	300053	287992	296436	299396	308777	311617	314362	328108	331319	334441
Northeast	CE	IBIAPABA	0	0	0	0	0	0	0	5	2	13	22	33	38	35	44	35	58	0	0	0	0	0	1.66667	2.33333	6.66667	12.3333	22.6667	31	38	39	38	45.6667	262973	266374	269810	277021	281011	284972	283599	295914	299447	295210	298022	300736	306828	309131	311344
Southeast	MG	UBERLANDIA	0	0	0	0	0	20	16	13	3	13	16	24	29	75	122	118	153	0	0	0	6.66667	12	16.3333	10.6667	9.66667	10.6667	17.6667	23	29	75.3333	105	131	717876	730981	744396	772559	788148	803615	816893	840286	853742	820245	829321	838094	873076	882384	891313
Center-West	GO	MEIA PONTE	0	0	0	0	0	0	8	17	8	16	18	16	36	29	35	49	87	0	0	0	0	2.66667	8.33333	11	13.6667	14	16.6667	23.3333	36	33.3333	37.6667	57	319846	324372	329005	332993	338445	343857	332286	345968	349530	361323	364937	368419	383739	387992	392108
Northeast	PI	SAO RAIMUNDO NONATO	0	0	0	0	0	0	10	4	1	1	1	5	14	4	13	17	30	0	0	0	0	3.33333	4.66667	5	2	1	2.33333	6.66667	14	10.3333	11.3333	20	122355	123192	124096	125993	127044	128083	134660	138546	140241	135122	136195	137225	138248	138782	139257
Center-West	MT	CANARANA	0	0	0	0	0	0	0	4	6	2	7	5	8	9	10	18	19	0	0	0	0	0	1.33333	3.33333	4	5	4.66667	6.66667	8	9	12.3333	15.6667	80545	81652	82819	85273	86631	87979	92023	95478	97072	99416	100977	102483	105035	106676	108272
Southeast	MG	ARAXA	0	0	0	0	0	0	0	0	3	6	8	13	9	18	34	28	34	0	0	0	0	0	0	1	3	5.66667	9	10	9	20.3333	26.6667	32	175336	176935	178438	181593	183337	185072	191550	199946	202466	204412	206774	209055	217880	220293	222607
Northeast	BA	ALAGOINHAS	0	0	0	0	0	5	11	6	4	10	21	24	27	48	51	36	64	0	0	0	1.66667	5.33333	7.33333	7	6.66667	11.6667	18.3333	24	27	42	45	50.3333	297032	300265	303734	309749	313171	318953	306418	319300	321740	322601	324846	327015	347910	350298	352553
Southeast	SP	BOTUCATU	0	0	0	0	0	3	15	4	2	5	13	10	28	34	26	29	42	0	0	0	1	6	7.33333	7	3.66667	6.66667	9.33333	17	28	29.3333	29.6667	32.3333	183633	186555	189444	195510	198867	202201	197866	208681	211410	207410	209492	211502	220973	223312	225585
South	PR	PARANAGUA	0	0	0	0	1	0	2	1	26	18	23	61	37	48	37	47	39	0	0	0.333333	0.333333	1	1	9.66667	15	22.3333	34	40.3333	37	40.6667	44	41	243016	248649	254592	267071	273979	280833	245820	255173	256933	265392	267664	269858	281270	283981	286602
South	PR	RIO NEGRO	0	0	0	0	0	0	0	1	0	1	1	3	7	8	12	14	15	0	0	0	0	0	0.333333	0.333333	0.666667	0.666667	1.66667	3.66667	7	9	11.3333	13.6667	80678	81611	82546	82776	83746	84709	82600	85806	86492	89531	90296	91035	94878	95791	96671
North	RR	CARACARAI	0	0	0	0	0	1	1	0	1	3	1	1	1	8	6	9	5	0	0	0	0.333333	0.666667	0.666667	0.666667	1.33333	1.66667	1.66667	1	1	5	7.66667	6.66667	31208	32041	32842	34732	35455	36379	36386	37924	38673	41886	42776	43635	45348	46161	46961
Northeast	MA	PRESIDENTE DUTRA	0	0	0	0	0	0	9	9	7	14	16	6	7	13	25	21	35	0	0	0	0	3	6	8.33333	10	12.3333	12	9.66667	7	15	19.6667	27	178535	180446	181461	183593	184773	185946	180464	185501	186078	191024	192012	192964	194017	194658	195258
Northeast	CE	SERRA DO PEREIRO	0	0	0	0	0	2	4	1	0	3	4	3	4	4	6	5	7	0	0	0	0.666667	2	2.33333	1.66667	1.33333	2.33333	3.33333	3.66667	4	4.66667	5	6	40267	40329	40271	40154	40087	40022	42969	44761	45165	42445	42600	42749	43393	43503	43608
Center-West	GO	CERES	0	0	0	0	0	0	10	11	8	10	8	17	27	33	33	21	48	0	0	0	0	3.33333	7	9.66667	9.66667	8.66667	11.6667	17.3333	27	31	29	34	212620	213304	213669	214436	214859	215282	216465	223083	223970	231239	232688	234079	242621	244394	246135
Southeast	SP	SOROCABA	0	0	2	0	15	7	28	44	34	101	92	105	136	155	175	186	242	0.666667	0.666667	5.66667	7.33333	16.6667	26.3333	35.3333	59.6667	75.6667	99.3333	111	136	155.333	172	201	1157340	1178512	1203409	1255666	1284589	1313295	1238518	1292076	1308111	1323847	1339127	1353899	1417110	1434155	1450720
South	SC	CANOINHAS	0	0	0	0	0	0	1	1	1	5	6	2	7	23	19	37	48	0	0	0	0	0.333333	0.666667	1	2.33333	4	4.33333	5	7	16.3333	26.3333	34.6667	233832	234924	236043	238392	239688	240980	238335	246293	247489	243739	244607	245439	251223	252359	253491
Center-West	MT	ALTO ARAGUAIA	0	0	0	0	0	0	2	0	2	2	7	2	1	1	6	8	2	0	0	0	0	0.666667	0.666667	1.33333	1.33333	3.66667	3.66667	3.33333	1	2.66667	5	5.33333	24366	24670	24877	25314	25556	25796	29031	30090	30666	34066	34823	35554	36797	37615	38412
Northeast	SE	BOQUIM	0	0	0	0	0	0	2	3	3	5	14	18	12	20	14	20	33	0	0	0	0	0.666667	1.66667	2.66667	3.66667	7.33333	12.3333	14.6667	12	15.3333	18	22.3333	144457	147594	149325	152957	154967	156961	149800	154285	155217	155327	156144	156003	162116	163026	163916
Southeast	ES	SAO MATEUS	0	0	0	0	0	1	2	8	4	22	15	9	24	26	34	19	33	0	0	0	0.333333	1	3.66667	4.66667	11.3333	13.6667	15.3333	16	24	28	26.3333	28.6667	160770	163550	165916	170880	173627	176355	167752	175005	176548	185949	188062	190102	204683	207605	210474
Northeast	CE	SERTAO DE INHAMUNS	0	0	0	0	1	1	6	1	1	3	9	11	13	16	16	28	16	0	0	0.333333	0.666667	2.66667	2.66667	2.66667	1.66667	4.33333	7.66667	11	13	15	20	20	138970	139821	140662	142422	143398	144364	141268	146535	147640	145375	145954	146511	148769	149190	149594
Southeast	SP	LIMEIRA	0	0	0	0	4	18	9	8	4	14	21	62	33	66	90	72	91	0	0	1.33333	7.33333	10.3333	11.6667	7	8.66667	13	32.3333	38.6667	33	63	76	84.3333	519378	527781	536377	554422	564411	574322	549094	569497	575180	578595	583921	589068	614840	620863	626715
Northeast	PE	MATA SETENTRIONAL PERNAMBUCANA	0	0	0	0	3	11	26	15	9	17	10	16	30	46	60	77	88	0	0	1	4.66667	13.3333	17.3333	16.6667	13.6667	12	14.3333	18.6667	30	45.3333	61	75	506492	510509	514098	521636	525807	529948	500652	516646	517613	535768	538287	540723	555390	557917	560367
Southeast	SP	ASSIS	0	0	0	0	0	0	1	1	10	7	10	15	20	26	21	41	49	0	0	0	0	0.333333	0.666667	4	6	9	10.6667	15	20	22.3333	29.3333	37	249792	252202	254702	259947	262853	265736	260072	271811	274139	263861	265178	266445	276655	278220	279744
North	TO	JALAPAO	0	0	2	0	0	1	5	5	0	2	4	3	5	8	5	14	12	0.666667	0.666667	0.666667	0.333333	2	3.66667	3.33333	2.33333	2	3	4	5	6	9	10.3333	62759	63277	63723	64352	65187	65705	68287	69442	70114	71925	72670	73385	76288	77087	77860
Northeast	CE	SANTA QUITERIA	0	0	0	0	1	0	9	10	7	12	11	23	11	10	12	12	5	0	0	0.333333	0.333333	3.33333	6.33333	8.66667	9.66667	10	15.3333	15	11	11	11.3333	9.66667	69579	69791	69996	70428	70668	70904	72346	74996	75530	72040	72236	72423	73458	73586	73708
Southeast	SP	LINS	0	0	1	0	0	0	5	2	0	2	6	16	14	29	18	22	27	0.333333	0.333333	0.333333	0	1.66667	2.33333	2.33333	1.33333	2.66667	8	12	14	20.3333	23	22.3333	148583	149885	151336	154386	156071	157748	155191	162883	164396	160220	161257	162256	168787	169992	171160
North	AM	PURUS	0	0	0	0	0	1	2	0	2	2	4	3	2	8	9	9	12	0	0	0	0.333333	1	1	1.33333	1.33333	2.66667	3	3	2	6.33333	8.66667	10	60596	58120	57114	55410	54048	52903	67922	70261	71225	69516	70226	70911	74737	75649	76545
South	PR	FLORAI	0	0	0	0	0	0	0	0	2	0	0	1	0	3	4	5	5	0	0	0	0	0	0	0.666667	0.666667	0.666667	0.333333	0.333333	0	2.33333	4	4.66667	37477	37413	37307	37086	36964	36843	36762	37789	37771	34695	34757	34815	35982	36091	36195
North	RO	ALVORADA D'OESTE	0	0	0	0	0	2	9	3	4	4	9	3	4	9	4	8	17	0	0	0	0.666667	3.66667	4.66667	5.33333	3.66667	5.66667	5.33333	5.33333	4	5.66667	7	9.66667	74460	76030	77680	84948	83065	84970	68034	70033	70143	70184	70011	69841	74999	75085	75169
South	PR	GUARAPUAVA	0	0	0	0	0	5	9	2	2	2	29	9	21	31	42	47	63	0	0	0	1.66667	4.66667	5.33333	4.33333	2	11	13.3333	19.6667	21	31.3333	40	50.6667	366937	369952	372877	379021	382422	385796	376653	390025	392385	378086	379251	380287	393616	395230	396791
Southeast	SP	ITAPECERICA DA SERRA	0	0	0	0	1	1	20	22	8	36	28	57	87	116	84	168	169	0	0	0.333333	0.666667	7.33333	14.3333	16.6667	22	24	40.3333	57.3333	87	95.6667	122.667	140.333	836486	859251	881070	926877	952229	977388	921000	960279	974638	986998	1000415	1013390	1063302	1078149	1092577
Northeast	SE	ESTANCIA	0	0	0	0	0	3	8	0	0	1	10	10	8	10	17	18	16	0	0	0	1	3.66667	3.66667	2.66667	0.333333	3.66667	7	9.33333	8	11.6667	15	17	112870	113514	115030	118212	119973	121720	119630	123323	124557	123628	124724	126708	130555	131762	132943
South	PR	LAPA	0	0	0	0	0	1	3	1	1	0	0	1	1	6	7	8	5	0	0	0	0.333333	1.33333	1.66667	1.66667	0.666667	0.333333	0.333333	0.666667	1	4.66667	7	6.66667	46553	47014	47450	48860	49381	49897	45889	47247	47281	49446	49673	49890	51750	52049	52339
Northeast	PE	ITAPARICA	0	0	0	0	6	2	1	0	0	3	3	5	6	10	12	17	26	0	0	2	2.66667	3	1	0.333333	1	2	3.66667	4.66667	6	9.33333	13	18.3333	117480	118188	118938	120511	121383	122246	127915	133847	135502	134212	135568	136878	141618	143029	144396
North	PA	SAO FELIX DO XINGU	0	0	0	0	1	1	8	8	14	8	13	24	36	23	17	21	39	0	0	0.333333	0.666667	3.33333	5.66667	10	10	11.6667	15	24.3333	36	25.3333	20.3333	25.6667	90906	90037	90444	91371	91775	92245	120478	128168	132063	166286	172209	177935	187552	193850	199960
South	SC	RIO DO SUL	0	0	0	0	1	10	8	3	1	6	5	7	12	12	25	28	30	0	0	0.333333	3.66667	6.33333	7	4	3.33333	4	6	8	12	16.3333	21.6667	27.6667	183582	184542	185469	187414	188493	189560	194456	201698	203485	204894	206618	208279	215329	217647	219944
Southeast	SP	PIRASSUNUNGA	0	0	0	0	0	2	5	15	4	15	32	20	30	25	23	25	26	0	0	0	0.666667	2.33333	7.33333	8	11.3333	17	22.3333	27.3333	30	26	24.3333	24.6667	168968	171445	173949	179202	182110	184996	177242	186327	188244	183561	184907	186206	193909	195455	196960
Northeast	SE	NOSSA SENHORA DAS DORES	0	0	0	0	0	5	0	0	1	0	1	3	7	4	13	4	8	0	0	0	1.66667	1.66667	1.66667	0.333333	0.333333	0.666667	1.33333	3.66667	7	8	7	8.33333	58658	59281	59904	44406	44987	45565	43779	45078	45378	62947	63335	63706	65884	66315	66734
South	SC	ITUPORANGA	0	0	0	0	0	0	0	0	0	0	1	1	2	4	10	6	6	0	0	0	0	0	0	0	0	0.333333	0.666667	1.33333	2	5.33333	6.66667	7.33333	51163	51180	51159	51119	51094	51072	53269	55127	55479	55763	56111	56444	58091	58555	59013
Southeast	SP	ARARAQUARA	0	0	0	2	1	0	4	5	3	5	12	22	35	50	46	63	93	0	0.666667	1	1	1.66667	3	4	4.33333	6.66667	13	23	35	43.6667	53	67.3333	454811	460576	466639	452460	458575	464642	450158	465267	469009	502149	506351	510405	532186	536967	541610
Southeast	MG	CAPELINHA	0	0	0	0	0	0	1	0	5	3	3	3	9	3	25	18	34	0	0	0	0	0.333333	0.333333	2	2.66667	3.66667	3	5	9	12.3333	15.3333	25.6667	187758	189949	191172	193739	195160	196571	196800	204361	205930	197507	198297	199054	205877	206785	207654
North	AM	PARINTINS	0	0	0	0	1	0	3	3	2	3	3	4	10	13	30	32	38	0	0	0.333333	0.333333	1.33333	2	2.66667	2.66667	2.66667	3.33333	5.66667	10	17.6667	25	33.3333	211402	217162	223206	233451	241639	248520	228277	239203	242594	242680	245643	248506	262719	266488	270186
Northeast	BA	BOQUIRA	0	0	0	0	0	0	1	3	4	1	9	8	41	40	16	24	33	0	0	0	0	0.333333	1.33333	2.66667	2.66667	4.66667	6	19.3333	41	32.3333	26.6667	24.3333	230429	180693	181606	236273	237911	185601	186245	192202	193416	187398	188049	188675	197866	198620	199366
South	PR	UNIAO DA VITORIA	0	0	0	0	0	0	1	1	2	2	2	1	3	4	4	13	28	0	0	0	0	0.333333	0.666667	1.33333	1.66667	2	1.66667	2	3	3.66667	7	15	112745	113977	115130	117545	118881	120208	116251	120808	121658	116691	117093	117480	121681	122250	122798
Southeast	SP	FRANCA	0	0	0	0	0	0	7	9	7	28	33	21	37	51	57	36	59	0	0	0	0	2.33333	5.33333	7.66667	14.6667	22.6667	27.3333	30.3333	37	48.3333	48	50.6667	357501	363360	369430	389669	396751	403778	392381	403005	407306	386704	389504	392208	408385	411607	414741
Southeast	MG	PARACATU	0	0	0	0	0	0	10	2	1	4	2	17	23	40	35	15	35	0	0	0	0	3.33333	4	4.33333	2.33333	2.33333	7.66667	14	23	32.6667	30	28.3333	199217	200749	202547	206318	208408	210480	208387	216449	218267	217618	219216	220756	229106	230798	232427
North	PA	GUAMA	0	0	0	0	12	6	24	37	25	34	53	29	58	40	41	68	60	0	0	4	6	14	22.3333	28.6667	32	37.3333	38.6667	46.6667	58	46.3333	49.6667	56.3333	370738	376799	383338	398169	404658	412198	390013	405951	410035	434556	440075	441719	450804	455970	460985
South	RS	LITORAL LAGUNAR	0	0	0	0	0	0	5	10	9	6	1	17	26	17	31	34	34	0	0	0	0	1.66667	5	8	8.33333	5.33333	8	14.6667	26	24.6667	27.3333	33	251201	252988	254927	258998	261252	263488	255714	258762	259554	259638	260472	261275	270769	271733	272641
Southeast	MG	SAO JOAO DEL REI	0	0	0	0	0	0	2	7	1	0	3	9	12	11	25	22	23	0	0	0	0	0.666667	3	3.33333	2.66667	1.33333	4	8	12	16	19.3333	23.3333	172469	174087	175431	106278	107385	108482	105087	108934	109624	182696	183587	184441	190935	191926	192875
Northeast	RN	AGRESTE POTIGUAR	0	0	0	0	0	2	9	9	23	37	27	38	16	37	24	35	31	0	0	0	0.666667	3.66667	6.66667	13.6667	23	29	34	27	16	25.6667	32	30	208486	210633	212918	199728	202018	204288	204278	210280	212242	229795	231654	233443	250338	252521	254656
South	PR	IRATI	0	0	0	0	5	2	7	1	0	5	3	2	1	4	4	18	15	0	0	1.66667	2.33333	4.66667	3.33333	2.66667	2	2.66667	3.33333	2	1	3	8.66667	12.3333	92262	92800	93338	94469	95094	95714	93892	97181	97664	97449	97897	98329	101993	102586	103158
Northeast	RN	ANGICOS	0	0	0	0	0	0	0	1	0	1	3	2	3	5	4	7	8	0	0	0	0	0	0.333333	0.333333	0.666667	1.33333	2	2.66667	3	4	5.33333	6.33333	50644	50475	50260	49816	49569	49324	50673	51977	52038	51304	51337	51364	53073	53139	53201
Northeast	MA	ALTO MEARIM E GRAJAU	0	0	0	0	1	0	21	31	23	31	13	12	19	34	30	28	59	0	0	0.333333	0.333333	7.33333	17.3333	25	28.3333	22.3333	18.6667	14.6667	19	27.6667	30.6667	39	269347	271839	274078	278786	281390	283974	287399	296376	299129	312039	312785	316734	320723	323562	328081
Southeast	SP	TATUI	0	0	0	0	0	1	8	5	3	17	12	15	21	30	41	24	37	0	0	0	0.333333	3	4.66667	5.33333	8.33333	10.6667	14.6667	16	21	30.6667	31.6667	34	215580	220193	224923	234850	240341	245794	236768	252240	256357	257318	260953	264467	277658	281671	285570
Northeast	CE	SOBRAL	0	0	0	0	2	1	3	3	3	10	12	18	31	34	40	57	46	0	0	0.666667	1	2	2.33333	3	5.33333	8.33333	13.3333	20.3333	31	35	43.6667	47.6667	332412	336925	341649	351560	357046	362491	362889	373857	378365	380844	385002	389017	397363	400799	404105
Center-West	GO	CATALAO	0	0	0	0	0	0	2	4	1	3	4	2	12	10	15	20	23	0	0	0	0	0.666667	2	2.33333	2.66667	2.66667	3	6	12	12.3333	15	19.3333	119782	121174	122524	125359	126929	128488	132546	139493	141552	147276	149509	151663	159001	161563	164075
Southeast	SP	MOJI-MIRIM	0	0	0	0	5	17	6	10	13	19	16	23	20	39	33	32	80	0	0	1.66667	7.33333	9.33333	11	9.66667	14	16	19.3333	19.6667	20	30.6667	34.6667	48.3333	557583	567102	577257	598573	610371	391221	366555	385188	389569	382879	386235	389477	406296	410102	413802
Southeast	MG	CURVELO	0	0	0	0	0	0	1	1	2	0	0	2	4	6	8	18	29	0	0	0	0	0.333333	0.666667	1.33333	1	0.666667	0.666667	2	4	6	10.6667	18.3333	144074	145290	146025	147571	148427	149274	143967	150211	150746	150701	151243	151761	156904	157538	158147
Northeast	CE	MEDIO CURU	0	0	0	0	0	1	1	1	1	13	11	11	6	3	10	11	10	0	0	0	0.333333	0.666667	1	1	5	8.33333	11.6667	9.33333	6	6.33333	8	10.3333	75543	76132	76648	77728	78327	78920	81010	84383	85027	84702	85447	86483	88176	88787	89371
North	RR	SUDESTE DE RORAIMA	0	0	0	0	0	1	1	0	1	2	2	0	1	1	1	8	9	0	0	0	0.333333	0.666667	0.666667	0.666667	1	1.66667	1.33333	1	1	1	3.33333	6	35374	36484	37873	41151	42406	44010	43044	44981	46122	45912	46867	47790	49646	50518	51376
Southeast	SP	CATANDUVA	0	0	0	0	0	0	5	4	1	2	10	11	5	15	17	24	40	0	0	0	0	1.66667	3	3.33333	2.33333	4.33333	7.66667	8.66667	5	12.3333	18.6667	27	204778	207094	209528	214632	217456	220261	213336	223788	225839	221465	222975	224432	233562	235304	237001
South	PR	FAXINAL	0	0	0	0	0	0	0	0	0	1	0	0	2	3	4	4	8	0	0	0	0	0	0	0	0.333333	0.333333	0.333333	0.666667	2	3	3.66667	5.33333	47100	46548	45923	44612	43885	43165	45413	46427	46235	46358	46244	46129	47422	47359	47301
Northeast	MA	PORTO FRANCO	0	0	0	0	1	7	17	18	6	6	6	3	5	10	12	16	12	0	0	0.333333	2.66667	8.33333	14	13.6667	10	6	5	4.66667	5	9	12.6667	13.3333	90782	91685	92619	99361	100516	101662	102605	105617	106702	109932	111489	112995	114767	116059	117278
Northeast	PE	FERNANDO DE NORONHA	0	0	0	0	0	0	0	0	0	0	0	0	2	1	0	1	0	0	0	0	0	0	0	0	0	0	0	0.666667	2	1	0.666667	0.333333	2096	2128	2163	2238	2280	2321	2801	3012	3108	2630	2675	2718	2837	2884	2930
Southeast	MG	MONTES CLAROS	0	0	0	0	0	0	1	3	5	6	9	16	24	35	61	73	83	0	0	0	0	0.333333	1.33333	3	4.66667	6.66667	10.3333	16.3333	24	40	56.3333	72.3333	545838	553077	559585	590831	599042	607194	607930	622178	628666	601867	606698	611361	634942	640028	644907
Southeast	SP	JUNDIAI	0	0	0	0	0	0	5	3	4	5	3	12	22	41	56	84	95	0	0	0	0	1.66667	2.66667	4	4	4	6.66667	12.3333	22	39.6667	60.3333	78.3333	540515	549349	558335	577198	587636	597997	580119	600955	607712	633273	641202	648871	679963	688773	697334
Northeast	MA	CODO	0	0	0	0	0	3	14	16	14	7	15	4	9	16	26	14	51	0	0	0	1	5.66667	11	14.6667	12.3333	12	8.66667	9.33333	9	17	18.6667	30.3333	243953	246545	248996	254140	256988	259813	248766	256054	257346	264258	266055	267789	269763	271051	272267
South	RS	JAGUARAO	0	0	0	0	0	0	1	0	1	0	0	1	0	2	4	8	6	0	0	0	0	0.333333	0.333333	0.666667	0.333333	0.333333	0.333333	0.333333	0	2	4.66667	6	56613	57021	57451	58354	58854	59349	53175	54340	54112	53154	52930	52712	54430	54329	54234
Southeast	MG	MANHUACU	0	0	0	0	0	0	3	2	1	3	2	3	10	8	22	23	52	0	0	0	0	1	1.66667	2	2	2	2.66667	5	10	13.3333	17.6667	32.3333	253576	256290	259038	256868	259789	262692	250483	259123	260480	273814	275626	277362	287639	289574	291431
Southeast	SP	GUARULHOS	0	0	0	0	2	47	40	59	29	48	66	64	75	103	104	172	212	0	0	0.666667	16.3333	29.6667	48.6667	42.6667	45.3333	47.6667	59.3333	68.3333	75	94	126.333	162.667	1212081	1241326	1271812	1335808	1371225	1406376	1354100	1404807	1427107	1347337	1360517	1373264	1434359	1449211	1463646
North	TO	GURUPI	0	0	0	0	0	2	5	3	3	5	6	2	4	11	7	19	23	0	0	0	0.666667	2.33333	3.33333	3.66667	3.66667	4.66667	4.33333	4	4	7.33333	12.3333	16.3333	122789	123554	124341	125443	126908	127816	129968	134037	135166	137217	138402	139542	144769	146042	147284
Northeast	CE	MEDIO JAGUARIBE	0	0	0	0	1	0	4	12	6	7	3	5	3	3	4	4	13	0	0	0.333333	0.333333	1.66667	5.33333	7.33333	8.33333	5.33333	5	3.66667	3	3.33333	3.66667	7	62335	62654	63063	63918	64391	64862	61235	65025	65303	62671	62741	62808	63615	63638	63660
Northeast	PE	ITAMARACA	0	0	0	0	0	4	3	6	1	6	9	5	25	15	7	23	31	0	0	0	1.33333	2.33333	4.33333	3.33333	4.33333	5.33333	6.66667	13	25	15.6667	15	20.3333	135954	138726	141217	146446	149340	152213	150778	158315	160739	165830	168324	170735	177798	180423	182965
Northeast	RN	LITORAL Northeast	0	0	0	0	0	0	0	0	1	3	6	2	5	2	9	12	9	0	0	0	0	0	0	0.333333	1.33333	3.33333	3.66667	4.33333	5	5.33333	7.66667	10	76690	78107	79465	82312	83886	85448	80695	83149	83891	84040	84723	85381	100243	101176	102083
North	PA	PORTEL	0	0	0	0	0	7	26	8	5	9	17	9	7	7	11	23	14	0	0	0	2.33333	11	13.6667	13	7.33333	10.3333	11.6667	11	7	8.33333	13.6667	16	98110	99934	101800	106034	107886	110037	106342	111042	112499	129906	132517	135041	139347	142011	144594
South	SC	TUBARAO	0	0	0	0	0	0	3	6	3	11	9	15	9	20	36	40	56	0	0	0	0	1	3	4	6.66667	7.66667	11.6667	11	9	21.6667	32	44	342507	346182	350096	358310	362853	367365	357180	369235	372145	374859	377765	380567	392934	396845	400714
Southeast	MG	MURIAE	0	0	0	0	0	0	2	4	1	1	1	4	9	9	21	25	49	0	0	0	0	0.666667	2	2.33333	2	1	2	4.66667	9	13	18.3333	31.6667	263145	265471	267295	271126	273247	275348	266831	275845	277067	275986	277107	278176	287735	289018	290247
Southeast	SP	CARAGUATATUBA	0	0	0	0	0	1	3	6	3	8	14	14	13	46	25	20	59	0	0	0	0.333333	1.33333	3.33333	4	5.66667	8.33333	12	13.6667	13	28	30.3333	34.6667	233271	240848	248362	264137	272867	281532	254824	272218	276863	281779	286165	290406	305417	310240	314926
South	PR	PARANAVAI	0	0	0	0	2	1	5	5	2	7	8	10	10	26	28	27	38	0	0	0.666667	1	2.66667	3.66667	4	4.66667	5.66667	8.33333	9.33333	10	21.3333	27	31	256967	257537	257945	261497	262293	263088	260589	269253	270180	270794	271800	272756	282595	283984	285326
Northeast	PB	GUARABIRA	0	0	0	0	0	1	1	2	4	2	3	6	10	10	13	13	15	0	0	0	0.333333	0.666667	1.33333	2.33333	2.66667	3	3.66667	6.33333	10	11	12	13.6667	159345	159011	159211	168549	168795	168902	172877	177291	178162	164827	124323	124512	126766	127047	127316
North	PA	SANTAREM	0	0	0	0	12	7	56	40	16	37	39	47	50	78	42	64	58	0	0	4	6.33333	25	34.3333	37.3333	31	30.6667	41	45.3333	50	56.6667	61.3333	54.6667	435025	438273	442035	450567	454300	458639	458314	466203	469490	484523	488699	492734	499965	503673	507271
Northeast	RN	BORBOREMA POTIGUAR	0	0	0	0	0	2	17	7	6	10	12	8	7	13	11	7	28	0	0	0	0.666667	6.33333	8.66667	10	7.66667	9.33333	10	9	7	10.3333	10.3333	15.3333	126275	126849	127350	146389	147338	148282	148643	153020	154006	134027	134764	135468	132698	133465	134212
Northeast	BA	SANTA MARIA DA VITORIA	0	0	0	0	0	0	3	1	2	3	11	9	13	24	9	19	33	0	0	0	0	1	1.33333	2	2	5.33333	7.66667	11	13	15.3333	17.3333	20.3333	178031	179311	179667	179280	179635	181226	179413	185645	186208	178311	178319	178323	189564	189796	190013
North	AM	COARI	0	0	0	0	1	0	4	3	0	3	5	9	14	8	21	14	21	0	0	0.333333	0.333333	1.66667	2.33333	2.33333	2	2.66667	5.66667	9.33333	14	14.3333	14.3333	18.6667	127317	130933	134928	141695	147102	151649	123164	131674	132518	152163	154456	156671	166344	169227	172058
South	PR	WENCESLAU BRAZ	0	0	0	0	0	1	0	0	0	1	0	0	5	4	10	6	17	0	0	0	0.333333	0.333333	0.333333	0	0.333333	0.333333	0.333333	1.66667	5	6.33333	6.66667	11	97384	97371	97345	97287	97254	97225	95040	97653	97589	98859	98974	99079	102330	102573	102808
North	RO	VILHENA	0	0	0	0	0	0	2	2	0	1	1	2	3	5	11	26	13	0	0	0	0	0.666667	1.33333	1.33333	1	0.666667	1.33333	2	3	6.33333	14	16.6667	107857	109525	111226	118712	116773	118734	121673	124833	126672	132677	134738	136730	149595	152211	154743
Southeast	MG	OLIVEIRA	0	0	0	0	0	0	1	0	0	3	2	2	6	7	4	9	29	0	0	0	0	0.333333	0.333333	0.333333	1	1.66667	2.33333	3.33333	6	5.66667	6.66667	14	120467	121595	122589	124681	125838	126986	123243	127400	128104	125981	126488	126972	131332	131912	132470
Southeast	SP	AMPARO	0	0	0	0	2	1	0	3	5	4	5	6	9	13	17	21	23	0	0	0.666667	1	1	1.33333	2.66667	4	4.66667	5	6.66667	9	13	17	20.3333	163928	166242	168492	173215	175827	178422	167117	173697	174808	178917	180266	181566	189121	190666	192167
North	AM	ALTO SOLIMOES	0	0	0	0	0	0	3	3	5	7	8	9	12	15	17	25	36	0	0	0	0	1	2	3.66667	5	6.66667	8	9.66667	12	14.6667	19	26	206778	213686	220342	228731	237595	245047	212440	219734	221875	224094	227851	231482	240175	242875	245521
Southeast	SP	JAU	0	0	0	0	0	1	2	3	1	5	9	6	16	18	31	44	43	0	0	0	0.333333	1	2	2	3	5	6.66667	10.3333	16	21.6667	31	39.3333	315473	320309	324667	300754	305284	309777	305942	323423	327570	346342	349066	351696	366479	369591	372618
Northeast	PE	GARANHUNS	0	0	0	0	10	24	28	25	13	21	17	16	49	66	50	32	64	0	0	3.33333	11.3333	20.6667	25.6667	22	19.6667	17	18	27.3333	49	55	49.3333	48.6667	416234	419093	421816	427542	430712	433851	429122	445207	448098	442117	444369	446537	458884	461152	463207
Southeast	SP	OSASCO	0	0	0	0	1	8	36	37	17	57	97	76	83	138	135	177	285	0	0	0.333333	3	15	27	30	37	57	76.6667	85.3333	83	118.667	150	199	1638611	1674468	1710100	1784900	1826295	1867383	1803723	1867199	1893233	1774846	1788447	1801601	1876915	1892513	1907674
Southeast	RJ	LAGOS	0	0	0	0	1	0	11	12	12	3	16	18	29	48	44	71	73	0	0	0.333333	0.333333	4	7.66667	11.6667	9	10.3333	12.3333	21	29	40.3333	54.3333	62.6667	398142	409909	422635	449352	464138	478811	468057	515260	528445	538470	550446	562026	575629	586326	596660
Northeast	AL	SANTANA DO IPANEMA	0	0	0	0	0	1	2	6	3	5	5	10	7	17	13	15	27	0	0	0	0.333333	1	3	3.66667	4.66667	4.33333	6.66667	7.33333	7	12.3333	15	18.3333	166636	168446	170260	174068	176175	178268	166278	171003	171515	171228	171746	172228	178863	179392	179875
South	PR	ASSAI	0	0	0	0	0	0	3	1	0	1	1	1	2	6	4	6	12	0	0	0	0	1	1.33333	1.33333	0.666667	0.666667	1	1.33333	2	4	5.33333	7.33333	72801	72365	71877	70851	70285	69720	70521	72343	72169	71173	71004	70836	72835	72749	72666
North	AM	BOCA DO ACRE	0	0	0	0	0	0	1	2	0	0	2	1	4	5	8	4	4	0	0	0	0	0.333333	1	1	0.666667	0.666667	1	2.33333	4	5.66667	5.66667	5.33333	44363	44474	44670	45115	45386	45611	47997	49796	50332	48798	49155	49500	51941	52413	52876
Northeast	AL	LITORAL North ALAGOANO	0	0	0	0	1	0	10	4	3	8	5	11	7	7	9	14	2	0	0	0.333333	0.333333	3.66667	4.66667	5.66667	5	5.33333	8	7.66667	7	7.66667	10	8.33333	72141	72798	73438	88837	89654	90470	91225	93487	94262	78887	79398	79887	82945	83404	83836
Northeast	MA	CHAPADINHA	0	0	0	0	0	3	1	5	3	1	3	0	1	9	17	22	32	0	0	0	1	1.33333	3	3	3	2.33333	1.33333	1.33333	1	9	16	23.6667	181117	181640	185379	187661	188923	190178	202135	208916	211503	219825	222736	225548	234229	236667	238969
Northeast	BA	FEIRA DE SANTANA	0	0	0	0	1	0	54	48	57	60	49	58	57	72	87	97	131	0	0	0.333333	0.333333	18.3333	34	53	55	55.3333	55.6667	54.6667	57	72	85.3333	105	442365	911840	920703	451406	453967	959590	989160	1015782	1026685	985105	991237	997949	1061803	1069089	1076045
Southeast	RJ	MACAE	0	0	0	0	0	2	0	0	2	2	2	29	23	9	13	49	25	0	0	0	0.666667	0.666667	0.666667	0.666667	1.33333	2	11	18	23	15	23.6667	29	178008	183106	187524	196802	201937	207033	216823	240278	246917	261540	268293	274822	282500	288604	294499
Northeast	CE	SERTAO DE CRATEUS	0	0	0	0	0	0	12	11	6	14	12	15	24	15	16	15	40	0	0	0	0	4	7.66667	9.66667	10.3333	10.6667	13.6667	17	24	18.3333	15.3333	23.6667	234374	235392	236246	238036	239027	240013	240039	248956	250504	240714	241281	241824	245203	245555	245891
Northeast	PI	VALENCA DO PIAUI	0	0	0	0	0	0	4	3	0	1	1	4	5	5	6	11	13	0	0	0	0	1.33333	2.33333	2.33333	1.33333	0.666667	2	3.33333	5	5.33333	7.33333	10	103869	104431	104975	109248	109971	110691	105822	108743	108933	104024	104089	104323	105074	105085	105099
Southeast	RJ	MACACU-CACERIBU	0	0	0	0	0	0	2	0	0	3	0	9	4	13	13	11	8	0	0	0	0	0.666667	0.666667	0.666667	1	1	4	4.33333	4	10	12.3333	10.6667	99617	100941	102198	61046	62126	63196	61205	65215	66087	109824	110714	111575	112574	113251	113905
Southeast	ES	SANTA TERESA	0	0	0	0	2	0	0	3	0	0	2	1	4	10	7	9	16	0	0	0.666667	0.666667	0.666667	1	1	1	0.666667	1	2.33333	4	7	8.66667	10.6667	99446	100412	101451	103634	104841	106039	99250	102686	103061	104527	105018	105489	112405	113196	113972
Southeast	MG	PIUI	0	0	0	0	0	0	0	0	1	0	0	3	2	7	6	6	12	0	0	0	0	0	0	0.333333	0.333333	0.333333	1	1.66667	2	5	6.33333	8	77692	78120	78526	79836	80373	80907	79014	81690	82058	81643	81984	82311	85144	85531	85904
North	TO	RIO FORMOSO	0	0	0	0	0	0	6	11	5	5	7	12	5	11	7	6	22	0	0	0	0	2	5.66667	7.33333	7	5.66667	8	8	5	7.66667	8	11.6667	104041	105189	106451	108217	110563	112020	108833	112031	112912	116002	117049	118053	122527	123649	124739
South	PR	PRUDENTOPOLIS	0	0	0	0	1	2	1	0	0	4	2	0	4	7	10	7	21	0	0	0.333333	1	1.33333	1	0.333333	1.33333	2	2	2	4	7	8	12.6667	118695	119459	120255	121925	122852	123770	126074	130794	132018	128327	129095	129917	135093	136147	137161
Center-West	MS	PARANAIBA	0	0	0	0	1	5	2	1	3	0	5	2	5	7	8	5	9	0	0	0.333333	2	2.66667	2.66667	2	1.33333	2.66667	2.33333	4	5	6.66667	6.66667	7.33333	71542	72086	72698	73984	74696	75402	72197	74701	75039	76468	76908	77331	79098	79569	80028
South	SC	XANXERE	0	0	0	0	0	1	0	0	0	1	0	1	1	1	5	16	23	0	0	0	0.333333	0.333333	0.333333	0	0.333333	0.333333	0.666667	0.666667	1	2.33333	7.33333	14.6667	143697	144916	146119	148643	150041	151427	145691	150531	151240	152465	153252	154003	158148	159189	160219
Northeast	PE	SALGUEIRO	0	0	0	0	0	2	3	5	3	0	6	1	3	8	16	8	22	0	0	0	0.666667	1.66667	3.33333	3.66667	2.66667	3	2.33333	3.33333	3	9	10.6667	15.3333	152558	153119	153694	154903	155572	156236	157248	162141	163053	162029	162818	163689	168165	168956	169719
Southeast	MG	BOM DESPACHO	0	0	0	0	0	0	3	1	0	2	2	3	4	5	8	23	17	0	0	0	0	1	1.33333	1.33333	1	1.33333	2.33333	3	4	5.66667	12	16	150417	151879	153375	169041	170940	172821	170749	177680	179290	165172	166445	167670	174076	175416	176705
Northeast	BA	PORTO SEGURO	0	0	0	0	0	1	17	18	4	14	22	15	27	62	65	76	78	0	0	0	0.333333	6	12	13	12	13.3333	17	21.3333	27	51.3333	67.6667	73	569671	661806	674854	592340	604149	702737	659813	685954	692448	727913	735155	742149	791457	798777	805684
Southeast	MG	JANAUBA	0	0	0	0	0	0	0	2	1	1	1	8	4	8	21	23	26	0	0	0	0	0	0.666667	1	1.33333	1	3.33333	4.33333	4	11	17.3333	23.3333	240080	241970	243730	247426	249468	251500	242571	251351	252482	247487	248207	248900	257153	258038	258884
North	RO	JI-PARANA	0	0	0	0	5	2	4	4	2	4	2	7	8	7	18	22	44	0	0	1.66667	2.33333	3.66667	3.33333	3.33333	3.33333	2.66667	4.33333	5.66667	8	11	15.6667	28	306896	310569	313536	326590	323208	326630	286634	295034	294006	295466	294803	294157	315964	316402	316823
Northeast	PB	CAJAZEIRAS	0	0	0	0	0	0	2	3	1	6	3	4	9	11	9	3	28	0	0	0	0	0.666667	1.66667	2	3.33333	3.33333	4.33333	5.33333	9	9.66667	7.66667	13.3333	157828	158396	158967	160163	160824	161485	164127	168609	169621	167971	144678	145816	149182	150016	150813
South	PR	CORNELIO PROCOPIO	0	0	0	0	0	0	1	2	3	6	2	5	8	4	13	18	16	0	0	0	0	0.333333	1	2	3.66667	3.66667	4.33333	5	8	8.33333	11.6667	15.6667	182716	182352	181904	177024	176395	175769	174636	179302	179085	176281	175748	175226	180025	179693	179373
Southeast	MG	PONTE NOVA	0	0	0	0	0	1	4	2	1	1	1	1	4	8	13	20	17	0	0	0	0.333333	1.66667	2.33333	2.33333	1.33333	1	1	2	4	8.33333	13.6667	16.6667	189573	189265	188810	180610	180160	179716	181792	187211	187511	187147	186919	186688	192038	191963	191894
Northeast	PB	ITAPORANGA	0	0	0	0	1	0	2	3	1	3	3	4	4	1	4	5	11	0	0	0.333333	0.333333	1	1.66667	2	2.33333	2.33333	3.33333	3.66667	4	3	3.33333	6.66667	83047	83032	82996	82921	82882	82841	83210	85622	85805	84034	75351	75388	76622	76704	76781
North	PA	CONCEICAO DO ARAGUAIA	0	0	0	0	0	0	1	2	2	5	7	11	12	7	10	16	14	0	0	0	0	0.333333	1	1.66667	3	4.66667	7.66667	10	12	9.66667	11	13.3333	102547	104428	106556	111384	113495	115950	125208	132444	135677	136684	139513	142249	146912	149806	152614
Southeast	RJ	SERRANA	0	0	0	0	0	0	1	2	3	5	0	85	157	174	119	6	2	0	0	0	0	0.333333	1	2	3.33333	2.66667	30	80.6667	157	150	99.6667	42.3333	450044	454889	459991	470702	476629	482512	476358	493146	497768	479914	482679	485354	488441	490311	492118
Southeast	ES	GUARAPARI	0	0	0	0	0	1	1	5	3	10	5	2	5	6	23	12	19	0	0	0	0.333333	0.666667	2.33333	3	6	6	5.66667	4	5	11.3333	13.6667	18	163563	167353	171261	179466	184008	188512	170248	178095	179905	185114	187127	189071	203418	206201	208948
North	PA	TUCURUI	0	0	0	0	2	0	8	26	15	28	18	42	46	44	24	34	36	0	0	0.666667	0.666667	3.33333	11.3333	16.3333	23	20.3333	29.3333	35.3333	46	38	34	31.3333	261385	268148	276509	295481	303781	313424	296696	310574	316510	328896	334946	340793	350813	356928	362863
Northeast	BA	RIBEIRA DO POMBAL	0	0	0	0	1	4	3	1	0	2	9	12	15	23	30	33	23	0	0	0.333333	1.66667	2.66667	2.66667	1.33333	1	3.66667	7.66667	12	15	22.6667	28.6667	28.6667	278723	295656	297294	281648	282677	304469	307697	316356	318562	309450	310697	311896	331015	332500	335586
Southeast	MG	GOVERNADOR VALADARES	0	0	0	0	0	0	3	2	4	10	7	5	3	15	30	27	53	0	0	0	0	1	1.66667	3	5.33333	7	7.33333	5	3	16	24	36.6667	398324	400123	401544	404528	406176	407815	411852	418659	420505	415696	417137	418522	432644	434348	435981
Northeast	BA	JACOBINA	0	0	0	0	0	3	3	1	2	5	4	9	9	18	19	33	36	0	0	0	1	2	2.33333	2	2.66667	3.66667	6	7.33333	9	15.3333	23.3333	29.3333	329201	314289	312829	319276	314687	309547	325627	337357	339105	326824	327545	328233	347825	348317	349295
Southeast	MG	SAO SEBASTIAO DO PARAISO	0	0	0	0	1	0	1	1	0	1	0	1	7	14	11	21	38	0	0	0.333333	0.333333	0.666667	0.666667	0.666667	0.666667	0.333333	0.666667	2.66667	7	10.6667	15.3333	23.3333	256985	259981	263079	269588	273187	276761	254819	262976	263736	265777	266741	267667	276748	277879	278961
Southeast	SP	CAPAO BONITO	0	0	0	0	0	0	0	1	1	2	4	6	11	6	8	14	12	0	0	0	0	0	0.333333	0.666667	1.33333	2.33333	4	7	11	8.33333	9.33333	11.3333	142484	142938	143392	128214	128655	129097	122463	125549	125369	135067	134543	134032	137613	137152	136702
Southeast	ES	BARRA DE SAO FRANCISCO	0	0	0	0	0	0	1	3	0	3	1	1	2	3	9	6	9	0	0	0	0	0.333333	1.33333	1.33333	2	1.33333	1.66667	1.33333	2	4.66667	6	8	86197	86470	86442	86386	86354	86322	86142	89075	89257	89244	89455	89657	95181	95603	96016
Northeast	CE	BREJO SANTO	0	0	0	0	0	0	5	7	6	10	4	6	3	7	7	11	8	0	0	0	0	1.66667	4	6	7.66667	6.66667	6.66667	4.33333	3	5.66667	8.33333	8.66667	89141	90006	93073	94974	96028	97071	92160	95304	96106	99891	100636	101356	103224	103818	104391
Northeast	PB	SAPE	0	0	0	0	0	0	7	2	3	5	7	5	6	4	5	0	33	0	0	0	0	2.33333	3	4	3.33333	5	5.66667	6	6	5	3	12.6667	123889	124305	124640	125342	125730	126115	127388	130912	131550	132745	109534	109711	111714	112665	112912
South	PR	FRANCISCO BELTRAO	0	0	0	0	2	3	2	1	1	5	4	4	11	11	18	18	27	0	0	0.666667	1.66667	2.33333	2	1.33333	2.33333	3.33333	4.33333	6.33333	11	13.3333	15.6667	21	224415	223891	223182	221696	220873	220057	228088	235700	236549	242411	243517	244577	253675	255135	256550
North	PA	PARAGOMINAS	0	0	0	0	0	0	8	2	5	13	14	10	8	20	23	16	42	0	0	0	0	2.66667	3.33333	5	6.66667	10.6667	12.3333	10.6667	8	17	19.6667	27	224216	231003	237573	252475	258993	266570	252663	265220	269954	291957	297725	306994	316737	322755	328594
Center-West	GO	ANAPOLIS	0	0	0	0	0	0	12	23	19	31	20	34	36	33	38	44	62	0	0	0	0	4	11.6667	18	24.3333	23.3333	28.3333	30	36	35.6667	38.3333	48	472083	478501	484679	497653	504827	511952	514253	530458	536696	540220	545991	551559	575001	581770	588405
Southeast	RJ	RIO DE JANEIRO	0	0	0	0	2	30	197	116	34	128	226	314	442	566	917	1264	714	0	0	0.666667	10.6667	76.3333	114.333	115.667	92.6667	129.333	222.667	327.333	442	641.667	915.667	965	10784953	10899147	11000156	5178347	5253198	5327489	5248658	5412006	5465987	11601307	11671912	11740202	11819151	11868032	11915242
Center-West	MS	CAMPO GRANDE	0	0	0	0	17	45	11	60	29	47	43	51	67	79	93	72	66	0	0	5.66667	20.6667	24.3333	38.6667	33.3333	45.3333	39.6667	47	53.6667	67	79.6667	81.3333	77	740422	755259	769785	800280	817161	833909	802128	827433	837325	873851	885360	896489	928198	941361	954197
Northeast	MA	BAIXADA MARANHENSE	0	0	0	0	9	10	13	9	12	38	44	38	32	46	57	38	46	0	0	3	6.33333	10.6667	10.6667	11.3333	19.6667	31.3333	40	38	32	45	47	47	489270	490805	495873	500495	506250	511963	515542	531804	537223	564191	570498	576587	581920	585881	590620
Northeast	PB	BREJO PARAIBANO	0	0	0	0	0	0	2	4	1	2	3	5	4	8	8	10	9	0	0	0	0	0.666667	2	2.33333	2.33333	2	3.33333	4	4	6.66667	8.66667	9	118086	117629	117004	115806	115109	114418	115982	119323	119255	116488	114511	114287	115849	115063	114974
Northeast	RN	SERRA DE SANTANA	0	0	0	0	1	0	1	1	2	8	6	5	6	3	0	9	6	0	0	0.333333	0.333333	0.666667	0.666667	1.33333	3.66667	5.33333	6.33333	5.66667	6	3	4	5	61240	61687	62154	63135	63675	64213	60100	61898	61968	61526	61594	61658	60095	60182	60507
Southeast	MG	UNAI	0	0	0	0	0	0	4	1	0	0	1	3	6	8	14	8	15	0	0	0	0	1.33333	1.66667	1.66667	0.333333	0.333333	1.33333	3.33333	6	9.33333	10	12.3333	139528	139909	140968	143185	144411	145630	142456	147179	148031	148800	149662	150490	155939	156877	157777
Northeast	BA	SANTO ANTONIO DE JESUS	0	0	0	0	0	1	8	5	2	7	11	24	28	40	37	38	62	0	0	0	0.333333	3	4.66667	5	4.66667	6.66667	14	21	28	35	38.3333	45.6667	511346	514565	518604	528291	533328	536319	525431	542202	546295	539858	542614	545271	579220	582505	585436
Center-West	MT	ROSARIO OESTE	0	0	0	0	2	1	1	1	2	2	3	1	3	2	2	3	2	0	0	0.666667	1	1.33333	1	1.33333	1.66667	2.33333	2	2.33333	3	2.33333	2.33333	2.33333	31437	31923	32025	32180	32300	32415	31674	32555	32618	30891	30834	30778	30675	30560	30448
South	RS	CAMPANHA OCIDENTAL	0	0	0	0	0	0	0	4	4	2	0	0	7	11	20	38	28	0	0	0	0	0	1.33333	2.66667	3.33333	2	0.666667	2.33333	7	12.6667	23	28.6667	383693	386847	389878	396244	399767	403261	360538	368556	367017	364249	363020	361829	373791	373335	372906
South	RS	SOLEDADE	0	0	0	0	0	0	0	2	0	0	2	3	4	2	3	6	8	0	0	0	0	0	0.666667	0.666667	0.666667	0.666667	1.66667	3	4	3	3.66667	5.66667	72061	72060	72021	71940	71896	71851	72472	74860	75072	71490	71492	71443	73898	73954	74005
North	AM	MADEIRA	0	0	1	0	0	0	3	4	3	7	10	0	4	6	8	22	14	0.333333	0.333333	0.333333	0	1	2.33333	3.33333	4.66667	6.66667	5.66667	4.66667	4	6	12	14.6667	132790	134476	136352	139530	142068	144204	148853	155149	157553	165663	168370	170985	181887	185281	188610
Northeast	MA	CHAPADAS DAS MANGABEIRAS	0	0	0	0	0	0	0	2	4	3	7	1	1	7	4	8	4	0	0	0	0	0	0.666667	2	3	4.66667	3.66667	3	1	4	6.33333	5.33333	61479	63093	63562	64548	65093	65634	65256	67194	67660	68036	69095	69548	70058	70395	70710
South	RS	CAMAQUA	0	0	0	0	0	0	1	3	2	1	1	4	0	2	11	8	12	0	0	0	0	0.333333	1.33333	2	2	1.33333	2	1.66667	0	4.33333	7	10.3333	124840	126228	127415	129905	131283	132652	126234	130912	131541	130448	130971	131476	136299	136860	137392
Northeast	PB	SOUSA	0	0	0	0	0	1	2	3	3	1	2	1	7	10	9	14	17	0	0	0	0.333333	1	2	2.66667	2.33333	2	1.33333	3.33333	7	8.66667	11	13.3333	173879	174193	174380	174769	174987	175204	178103	183248	184072	181850	173709	174717	179126	180382	181591
Southeast	MG	BOCAIUVA	0	0	0	0	0	0	1	0	0	1	2	3	1	3	2	4	10	0	0	0	0	0.333333	0.333333	0.333333	0.333333	1	2	2	1	2	3	5.33333	63638	64154	64627	65622	66174	66720	66026	68502	68992	68624	69048	69456	71995	72452	72892
Northeast	PE	SERTAO DO MOXOTO	0	0	0	0	13	6	5	5	1	2	6	7	12	6	5	12	33	0	0	4.33333	6.33333	8	5.33333	3.66667	2.66667	3	5	8.33333	12	7.66667	7.66667	16.6667	185784	186551	187187	188523	189263	189998	200217	209345	211643	212556	214662	216693	224139	226038	227553
South	SC	BLUMENAU	0	0	0	0	7	11	12	10	4	9	9	13	40	36	55	53	59	0	0	2.33333	6	10	11	8.66667	7.66667	7.33333	10.3333	20.6667	40	43.6667	48	55.6667	559927	569751	580037	601631	613579	625440	626359	645017	654453	677376	687351	696990	729835	743398	756836
Southeast	SP	PIEDADE	0	0	0	0	0	2	0	2	2	3	10	11	11	12	15	16	12	0	0	0	0.666667	0.666667	1.33333	1.33333	2.33333	5	8	10.6667	11	12.6667	14.3333	14.3333	181912	185082	188447	195511	199420	203299	178292	184187	184675	189228	190106	190951	198190	199246	200274
Northeast	PI	ALTO MEDIO CANINDE	2	0	0	0	4	3	15	6	7	16	19	13	16	17	15	22	20	0.666667	0	1.33333	2.33333	7.33333	8	9.33333	9.66667	14	16	16	16	16	18	19	243216	244875	246372	248464	250183	251887	256360	264149	266858	261938	263505	264998	266945	267714	268311
Northeast	BA	VALENCA	0	0	0	0	0	0	2	2	5	4	8	5	2	11	10	12	39	0	0	0	0	0.666667	1.33333	3	3.66667	5.66667	5.66667	5	2	7.66667	11	20.3333	232750	239044	239985	235920	237021	244115	247083	255933	257650	263185	265169	267081	284635	286795	289292
Northeast	MA	PINDARE	0	0	0	0	0	5	13	15	2	6	11	14	16	50	42	29	66	0	0	0	1.66667	6	11	10	7.66667	6.33333	10.3333	13.6667	16	36	40.3333	45.6667	558471	565073	571615	582136	589719	597243	580950	598584	603266	621431	629369	634376	642579	648120	650498
Southeast	MG	CONSELHEIRO LAFAIETE	0	0	0	0	0	0	9	3	6	7	17	7	10	14	20	16	19	0	0	0	0	3	4	6	5.33333	10	10.3333	11.3333	10	14.6667	16.6667	18.3333	223587	225358	227723	232692	235440	238172	235100	244412	246675	247251	249327	251333	261120	263295	265383
Northeast	BA	ENTRE RIOS	0	0	0	0	0	0	0	1	0	1	1	3	1	6	0	8	18	0	0	0	0	0	0.333333	0.333333	0.666667	0.666667	1.66667	1.66667	1	2.33333	4.66667	8.66667	122067	107761	109863	124986	125779	119088	109139	114395	115441	115524	116433	117308	124892	125840	126734
North	RO	PORTO VELHO	0	0	0	0	0	1	18	10	8	16	14	20	12	10	26	47	59	0	0	0	0.333333	6.33333	9.66667	12	11.3333	12.6667	16.6667	15.3333	12	16	27.6667	44	426640	437202	448419	497775	485002	497936	476967	486884	493445	540320	550094	559543	613757	625834	637530
Northeast	BA	BARREIRAS	0	0	0	0	3	0	8	19	5	11	7	30	20	21	18	18	32	0	0	1	1	3.66667	9	10.6667	11.6667	7.66667	16	19	20	19.6667	19	22.6667	263597	215151	219245	281023	285925	237203	258274	274496	281255	286118	292220	298118	321062	326787	332223
Northeast	BA	VITORIA DA CONQUISTA	0	0	0	0	0	2	7	3	7	19	28	20	36	31	50	47	37	0	0	0	0.666667	3	4	5.66667	9.66667	18	22.3333	28	36	39	42.6667	44.6667	690113	624430	632375	709092	717797	667232	621769	633326	635436	626807	628610	629222	664905	666427	668034
South	RS	CAXIAS DO South	0	0	0	0	0	2	6	2	3	7	13	13	18	24	69	50	49	0	0	0	0.666667	2.66667	3.33333	3.66667	4	7.66667	11	14.6667	18	37	47.6667	56	667848	679014	690778	715479	729152	742716	719571	742317	750766	769617	778527	787135	818896	826612	833878
Southeast	SP	NHANDEARA	0	0	0	0	0	1	0	1	0	0	6	0	3	3	7	3	4	0	0	0	0.333333	0.333333	0.666667	0.333333	0.333333	2	2	3	3	4.33333	4.33333	4.66667	58913	59334	59538	59967	60203	60439	61322	64063	64535	65337	65835	66314	69070	69637	70192
Northeast	AL	PENEDO	0	0	0	0	0	10	3	4	3	2	1	3	9	7	14	3	9	0	0	0	3.33333	4.33333	5.66667	3.33333	3	2	2	4.33333	9	10	8	8.66667	118246	118969	119693	121210	122051	122884	121873	125298	125997	124552	125103	125498	130608	131126	131611
Southeast	MG	ITAJUBA	0	0	0	0	0	0	2	0	2	2	5	9	7	7	9	14	14	0	0	0	0	0.666667	0.666667	1.33333	1.33333	3	5.33333	7	7	7.66667	10	12.3333	183503	185078	186752	190266	192213	194144	183877	189969	190671	189193	189793	190364	196723	197455	198146
Northeast	AL	SERRANA DOS QUILOMBOS	0	0	0	0	0	1	8	7	4	11	5	5	4	15	8	8	14	0	0	0	0.333333	3	5.33333	6.33333	7.33333	6.66667	7	4.66667	4	9	10.3333	10	143357	143427	143498	143643	143725	143804	145897	150303	150890	146573	146833	147188	152901	153191	153466
Northeast	BA	CATU	0	0	0	0	0	0	5	5	1	1	5	1	5	4	6	24	17	0	0	0	0	1.66667	3.33333	3.66667	2.33333	2.33333	2.33333	3.66667	5	5	11.3333	15.6667	148987	194439	196091	154564	156096	203342	202968	210756	212613	217003	219011	220952	235510	237559	239492
Southeast	RJ	BARRA DO PIRAI	0	0	0	0	0	1	1	1	0	3	1	1	5	15	12	10	13	0	0	0	0.333333	0.666667	1	0.666667	1.33333	1.33333	1.66667	2.33333	5	10.6667	12.3333	11.6667	164335	165799	167359	6213807	6258271	6302407	6260622	6338527	6366362	175182	176161	177108	178198	178851	179482
Northeast	PB	CURIMATAU OCIDENTAL	0	0	0	0	1	1	4	3	2	3	4	1	3	5	8	12	13	0	0	0.333333	0.666667	2	2.66667	3	2.66667	3	2.66667	2.66667	3	5.33333	8.33333	11	107846	108409	108821	109564	110012	110457	114997	118048	119021	119735	162144	163224	167418	168642	169816
Southeast	SP	AVARE	0	0	0	0	0	1	1	2	0	4	4	2	4	11	11	7	19	0	0	0	0.333333	0.666667	1.33333	1	2	2.66667	3.33333	3.33333	4	8.66667	9.66667	12.3333	161284	163834	166563	172291	175462	178609	169332	178242	180165	178434	180009	181529	189379	191163	192896
Center-West	GO	ARAGARCAS	0	0	0	0	0	0	0	1	0	1	1	0	7	2	0	3	8	0	0	0	0	0	0.333333	0.333333	0.666667	0.666667	0.666667	2.66667	7	3	1.66667	3.66667	53650	53664	53645	53606	53582	53561	53831	55201	55305	55451	55588	55718	57464	57659	57851
Southeast	SP	CAMPINAS	0	0	0	0	1	5	20	17	12	27	33	90	111	148	182	157	211	0	0	0.333333	2	8.66667	14	16.3333	18.6667	24	50	78	111	147	162.333	183.333	2257640	2300788	2343134	2432017	2481207	2530029	2486430	2573019	2608081	2630893	2663241	2694521	2822880	2858848	2893802
Southeast	MG	PATOS DE MINAS	0	0	0	0	0	0	0	1	0	1	7	5	7	16	16	14	20	0	0	0	0	0	0.333333	0.333333	0.666667	2.66667	4.33333	6.33333	7	13	15.3333	16.6667	236231	239370	242585	249333	253068	256774	245146	255396	257526	253241	254843	256387	265815	267542	269200
Southeast	SP	BANANAL	0	0	0	0	0	0	0	0	0	1	0	1	0	2	1	2	2	0	0	0	0	0	0	0	0.333333	0.333333	0.666667	0.333333	0	1	1.66667	1.66667	25670	25862	26054	26454	26676	26895	26171	27262	27425	26281	26347	26410	27333	27418	27501
Northeast	MA	LENCOIS MARANHENSES	0	0	0	0	0	0	2	2	5	6	6	1	0	3	11	12	12	0	0	0	0	0.666667	1.33333	3	4.33333	5.66667	4.33333	2.33333	0	4.66667	8.66667	11.6667	132829	134516	139610	143549	145731	147894	155154	159238	161722	176200	179464	183427	186318	189098	191719
Northeast	MA	IMPERATRIZ	0	0	0	0	0	2	23	13	11	13	6	16	24	14	40	25	40	0	0	0	0.666667	8.33333	12.6667	15.6667	12.3333	10	11.6667	15.3333	24	26	26.3333	35	516307	521559	526832	537903	544028	550108	529091	545711	548874	566866	571234	575448	580283	583526	586584
Southeast	MG	GRAO MOGOL	0	0	0	0	0	0	0	0	0	0	0	0	0	1	1	3	4	0	0	0	0	0	0	0	0	0	0	0	0	0.666667	1.66667	2.66667	40815	40965	41096	41375	41529	41682	42046	43546	43803	42669	42826	42972	44428	44606	44779
Southeast	SP	NOVO HORIZONTE	0	0	0	0	0	0	0	1	2	0	0	1	1	0	0	8	7	0	0	0	0	0	0.333333	1	1	0.666667	0.333333	0.666667	1	0.333333	2.66667	5	72624	73139	73689	74844	75482	76118	74654	77950	78499	79222	79784	80324	83614	84260	84885
Southeast	SP	FERNANDOPOLIS	0	0	0	0	0	0	1	1	0	0	3	9	6	4	5	10	4	0	0	0	0	0.333333	0.666667	0.666667	0.333333	1	4	6	6	5	6.33333	6.33333	95389	95872	96385	97461	98058	98648	93929	96857	96984	104623	104954	105266	109046	109461	109865
Northeast	CE	VARZEA ALEGRE	0	0	0	0	1	2	4	0	0	4	0	1	0	1	5	3	9	0	0	0.333333	1	2.33333	2	1.33333	1.33333	1.33333	1.66667	0.333333	0	2	3	5.66667	92399	92997	93626	94946	95678	96402	94399	98253	98845	96702	97081	97444	98938	99214	99477
North	TO	PORTO NACIONAL	0	0	0	0	0	0	5	6	5	6	3	8	16	10	7	26	32	0	0	0	0	1.66667	3.66667	5.33333	5.66667	4.66667	5.66667	9	16	11	14.3333	21.6667	232417	242985	254275	270095	291094	304110	266697	273576	278981	322824	330824	338559	358276	366873	375255
North	PA	TOME-ACU	0	0	0	0	1	2	6	9	13	23	16	12	10	20	27	10	18	0	0	0.333333	1	3	5.66667	9.33333	15	17.3333	17	12.6667	10	19	19	18.3333	218379	224314	230155	243404	249201	255936	247723	256324	260679	287618	293445	299079	308695	314645	320418
Northeast	CE	CHOROZINHO	0	0	0	0	0	0	1	1	0	0	3	1	5	2	2	1	8	0	0	0	0	0.333333	0.666667	0.666667	0.333333	1	1.33333	3	5	3	1.66667	3.66667	58065	58837	59544	61027	61848	62663	60447	62398	62864	62495	62893	63278	64387	64700	65002
Northeast	CE	URUBURETAMA	0	0	0	0	5	8	8	7	0	13	12	1	10	6	3	5	10	0	0	1.66667	4.33333	7	7.66667	5	6.66667	8.33333	8.66667	7.66667	10	6.33333	4.66667	6	88013	89317	90680	93544	95129	96702	96321	100200	101333	101325	102485	103290	105552	106512	107434
South	RS	SANTIAGO	0	0	0	0	0	0	0	2	0	1	0	1	0	0	7	4	8	0	0	0	0	0	0.666667	0.666667	1	0.333333	0.666667	0.333333	0	2.33333	3.66667	6.33333	111859	112405	112976	137743	138938	140126	132131	136438	136737	110682	110650	110611	114432	114550	114658
Northeast	CE	IPU	0	0	0	0	0	0	1	1	2	7	8	5	7	6	5	6	12	0	0	0	0	0.333333	0.666667	1.33333	3.33333	5.66667	6.66667	6.66667	7	6	5.66667	7.66667	137061	138315	139624	142374	143894	145404	135332	139511	139799	137423	137548	137667	139413	139437	139462
South	PR	PORECATU	0	0	0	0	0	0	0	0	3	4	2	3	9	5	4	4	6	0	0	0	0	0	0	1	2.33333	3	3	4.66667	9	6	4.33333	4.66667	83065	82907	82707	82284	82046	81816	81236	83480	83420	82539	82481	82422	84929	84973	85016
Northeast	PB	CARIRI ORIENTAL	0	0	0	0	0	0	0	2	1	0	4	2	6	4	8	3	5	0	0	0	0	0	0.666667	1	1	1.66667	2	4	6	6	5	5.33333	60172	60385	60572	60962	61177	61388	62054	63789	64122	63704	95465	95188	97122	97487	97837
Northeast	BA	PAULO AFONSO	0	0	0	0	0	0	0	1	2	3	2	4	2	7	9	10	11	0	0	0	0	0	0.333333	1	2	2.33333	3	2.66667	2	6	8.66667	10	168815	153579	155353	177345	179749	163150	158358	164628	166012	167118	168495	169823	180862	182289	183634
Center-West	MT	RONDONOPOLIS	0	0	0	0	2	0	5	7	13	12	15	11	9	12	9	18	22	0	0	0.666667	0.666667	2.33333	4	8.33333	10.6667	13.3333	12.6667	11.6667	9	10	13	16.3333	228173	231476	235008	242422	246525	250598	252809	261980	265665	275707	279691	283538	290068	294225	298273
South	SC	SAO BENTO DO SUL	0	0	0	0	0	0	0	0	0	0	0	0	0	0	4	8	10	0	0	0	0	0	0	0	0	0	0	0	0	1.33333	4	7.33333	117859	120231	122762	128074	131014	133933	126164	131281	132860	126395	127288	128150	132137	133339	134530
Northeast	AL	SAO MIGUEL DOS CAMPOS	0	0	0	0	1	7	4	3	3	7	7	8	15	16	11	19	18	0	0	0.333333	2.66667	4	4.66667	3.33333	4.33333	5.66667	7.33333	10	15	14	15.3333	16	239966	241698	243305	246681	248547	250400	260990	269526	272501	272367	274985	277817	290463	292746	294902
Northeast	CE	CASCAVEL	0	0	0	0	1	0	1	0	0	1	4	5	5	2	3	8	12	0	0	0.333333	0.333333	0.666667	0.333333	0.333333	0.333333	1.66667	3.33333	4.66667	5	3.33333	4.33333	7.66667	116676	118352	120175	124003	126122	128225	127208	133225	135038	134136	135650	137114	140101	141358	142564
Southeast	MG	OURO PRETO	0	0	0	0	0	0	0	1	0	1	2	1	2	4	8	3	19	0	0	0	0	0	0.333333	0.333333	0.666667	1	1.33333	1.66667	2	4.66667	5	10	157046	158629	160379	164051	166084	168100	165104	170614	172082	173797	175253	176658	183537	185065	186529
Southeast	SP	GUARATINGUETA	0	0	0	0	1	2	1	5	8	10	7	13	10	17	23	20	25	0	0	0.333333	1	1.33333	2.66667	4.66667	7.66667	8.33333	10	10	10	16.6667	20	22.6667	378282	382397	386328	394579	399148	403678	394359	412636	416247	402133	404304	406396	422203	424770	427268
Southeast	MG	GUANHAES	0	0	0	0	0	0	1	0	0	0	1	1	4	3	5	7	11	0	0	0	0	0.333333	0.333333	0.333333	0	0.333333	0.666667	2	4	4	5	7.66667	128187	128112	128080	128017	127981	127945	130365	133672	134119	130963	131184	131392	135566	135878	136176
Northeast	PI	BAIXO PARNAIBA PIAUIENSE	0	0	0	0	0	0	5	4	1	1	4	3	12	8	12	18	22	0	0	0	0	1.66667	3	3.33333	2	2	2.66667	6.33333	12	10.6667	12.6667	17.3333	306030	308082	310262	312454	314867	317261	319962	329274	331832	329372	331375	333303	335771	336764	337635
Northeast	PB	ITABAIANA	0	0	0	0	0	1	5	1	3	11	1	4	6	4	6	4	7	0	0	0	0.333333	2	2.33333	3	5	5	5.33333	3.66667	6	5.33333	4.66667	5.66667	106487	106376	106225	105913	105738	105567	107851	111006	111347	108561	106840	107799	109863	110182	110488
Northeast	BA	LIVRAMENTO DO BRUMADO	0	0	0	0	4	0	1	3	1	3	2	1	1	8	7	1	8	0	0	1.33333	1.33333	1.66667	1.33333	1.66667	2.33333	2	2	1.33333	1	5.33333	5.33333	5.33333	100794	92635	93142	103571	104376	95365	94976	98736	99387	97826	98365	98888	102995	103581	104132
Center-West	MT	COLIDER	0	0	0	0	1	3	3	3	4	0	22	6	4	4	9	11	3	0	0	0.333333	1.33333	2.33333	3	3.33333	2.33333	8.66667	9.33333	10.6667	4	5.66667	8	7.66667	128571	128291	127703	126471	125791	125113	142321	148506	150321	143650	144736	145783	147540	148564	149561
Northeast	PE	PAJEU	0	0	0	0	1	2	2	2	1	6	13	6	12	9	16	13	21	0	0	0.333333	1	1.66667	2	1.66667	3	6.66667	8.33333	10.3333	12	12.3333	12.6667	16.6667	297330	297593	297639	297738	297792	297846	310055	321308	323469	314603	315928	317197	325564	326876	328145
Northeast	PB	LITORAL North	0	0	0	0	0	0	1	1	2	4	2	5	12	9	11	2	7	0	0	0	0	0.333333	0.666667	1.33333	2.33333	2.66667	3.66667	6.33333	12	10.6667	7.33333	6.66667	130118	130504	131421	133347	134412	135467	137640	141458	142661	142023	125898	126663	129911	130856	131767
Northeast	PE	ALTO CAPIBARIBE	0	0	0	0	11	17	14	9	4	4	1	7	7	2	6	12	28	0	0	3.66667	9.33333	14	13.3333	9	5.66667	3	4	5	7	5	6.66667	15.3333	216626	219817	223217	230356	234305	238224	244236	256897	261233	273729	278434	282980	295501	300460	305270
South	PR	CURITIBA	0	0	0	5	2	2	4	8	14	7	23	28	58	72	119	193	187	0	1.66667	2.33333	3	2.66667	4.66667	8.66667	9.66667	14.6667	19.3333	36.3333	58	83	128	166.333	2742403	2801204	2865613	3000314	3075128	3149373	3056985	3147183	3194246	3060332	3090916	3120488	3258115	3294011	3328666
Southeast	ES	VITORIA	0	0	0	0	0	0	1	0	3	14	18	29	25	55	75	83	108	0	0	0	0	0.333333	0.333333	1.33333	5.66667	11.6667	20.3333	24	25	51.6667	71	88.6667	1371048	1394472	1421063	1476878	1507769	1538424	1511555	1545090	1565080	1565393	1582912	1599855	1722164	1746455	1770314
Southeast	MG	TEOFILO OTONI	0	0	0	0	0	0	1	4	1	4	3	1	0	5	12	8	21	0	0	0	0	0.333333	1.66667	2	3	2.66667	2.66667	1.33333	0	5.66667	8.33333	13.6667	258160	258851	257890	255878	254762	253658	258343	265766	266029	266651	267100	267523	276042	276681	277293
Northeast	RN	VALE DO ACU	0	0	0	0	0	0	3	4	1	0	3	5	3	5	9	3	10	0	0	0	0	1	2.33333	2.66667	1.66667	1.33333	2.66667	3.66667	3	5.66667	5.66667	7.33333	126202	127454	128713	131347	132803	134253	134790	138890	140217	140534	141750	142922	147188	148548	149872
South	RS	PASSO FUNDO	0	0	0	0	0	0	1	1	0	4	2	2	6	5	5	17	28	0	0	0	0	0.333333	0.666667	0.666667	1.66667	2	2.66667	3.33333	6	5.33333	9	16.6667	303649	306876	310117	316921	320691	324427	321337	329630	332394	327703	329853	331915	344497	346534	348452
Northeast	RN	SERIDO OCIDENTAL	0	0	0	0	0	0	5	2	1	6	1	0	3	0	6	6	3	0	0	0	0	1.66667	2.33333	2.66667	3	2.66667	2.33333	1.33333	3	3	4	5	90480	91421	92285	94094	95099	96094	95154	97959	98734	97680	98308	98910	192682	194976	197212
Northeast	MA	GERAIS DE BALSAS	0	0	0	0	0	0	8	11	0	1	8	1	3	0	4	10	6	0	0	0	0	2.66667	6.33333	6.33333	4	3	3.33333	4	3	2.33333	4.66667	6.66667	107571	109257	111114	115013	117171	119312	124451	128451	130718	130425	132359	134229	136434	138048	139570
Southeast	MG	SANTA RITA DO SAPUCAI	0	0	0	0	0	0	0	0	0	2	0	2	1	0	5	6	10	0	0	0	0	0	0	0	0.666667	0.666667	1.33333	1	1	2	3.66667	7	129797	131243	132650	158671	160262	161838	157804	163590	164688	140170	141094	141984	147238	148216	149163
North	PA	ALMEIRIM	0	0	0	0	0	0	0	3	1	2	2	3	4	9	3	5	2	0	0	0	0	0	1	1.33333	2	1.66667	2.33333	3	4	5.33333	5.66667	3.33333	57383	59416	60305	62321	63203	64228	57151	59164	59283	67570	68344	69092	70403	71135	71843
Southeast	MG	ITABIRA	0	0	0	0	0	0	6	6	6	5	2	13	8	15	14	15	26	0	0	0	0	2	4	6	5.66667	4.33333	6.66667	7.66667	8	12.3333	14.6667	18.3333	354924	357990	360367	365358	368124	370865	370468	384348	387241	379237	381269	383226	396930	399170	401315
Northeast	SE	COTINGUIBA	0	0	0	0	0	2	0	0	2	3	8	4	3	5	4	1	2	0	0	0	0.666667	0.666667	0.666667	0.666667	1.66667	4.33333	5	5	3	4	3.33333	2.33333	40537	40900	41180	41773	42099	42423	43563	44915	45350	46840	47344	47831	49763	50315	50854
Northeast	AL	ARAPIRACA	0	0	0	0	7	44	24	9	3	4	4	8	8	12	25	17	16	0	0	2.33333	17	25	25.6667	12	5.33333	3.66667	5.33333	6.66667	8	15	18	19.3333	374824	378772	382928	391818	396816	401698	395524	405859	409219	410798	413975	416709	434661	437452	440103
North	AC	RIO BRANCO	0	0	0	0	0	0	3	2	9	6	1	2	2	8	8	11	42	0	0	0	0	1	1.66667	4.66667	5.66667	5.33333	3	1.66667	2	6	9	20.3333	328893	336770	345308	357462	381953	392416	365098	380763	386868	418113	425796	433224	444009	452251	460354
Northeast	SE	AGRESTE DE LAGARTO	0	0	0	0	0	1	0	0	1	3	3	1	5	0	5	5	6	0	0	0	0.333333	0.333333	0.333333	0.333333	1.33333	2.33333	2.33333	3	5	3.33333	3.33333	5.33333	104028	105355	106664	109411	110932	112440	108023	111263	112062	114247	115147	116016	120267	121262	122233
Northeast	PI	CAMPO MAIOR	0	0	0	0	0	0	7	2	0	0	0	1	3	2	8	12	9	0	0	0	0	2.33333	3	3	0.666667	0	0.333333	1.33333	3	4.33333	7.33333	9.66667	214138	214813	215148	214649	215174	215591	222462	228979	230433	224154	224921	225652	227304	227666	227982
Center-West	GO	QUIRINOPOLIS	0	0	0	0	0	0	1	5	6	2	1	3	6	4	5	5	5	0	0	0	0	0.333333	2	4	4.33333	3	2	3.33333	6	5	4.66667	5	94007	94490	94949	88770	89304	89835	87560	91478	91922	110809	112141	113424	118446	119995	121515
Northeast	CE	LITORAL DE ARACATI	0	0	0	0	2	0	1	1	2	2	0	0	6	2	7	5	2	0	0	0.666667	0.666667	1	0.666667	1.33333	1.66667	1.33333	0.666667	2	6	5	4.66667	4.66667	97795	99216	100762	104008	105805	107587	105935	110633	112051	109684	110745	111770	114048	114917	115752
Center-West	MT	MEDIO ARAGUAIA	0	0	0	0	0	0	0	0	0	2	0	1	0	0	2	5	1	0	0	0	0	0	0	0	0.666667	0.666667	1	0.333333	0	0.666667	2.33333	2.66667	61738	62253	62890	64230	64968	65705	62057	63959	64219	65247	65583	65908	66449	66734	67011
Northeast	AL	MATA ALAGOANA	0	0	0	0	1	9	14	1	8	14	12	12	5	13	12	13	13	0	0	0.333333	3.33333	8	8	7.66667	7.66667	11.3333	12.6667	9.66667	5	10	12.6667	12.6667	282234	282120	281587	266415	265720	265031	288914	297893	300536	301464	302927	304291	316769	318124	319401
Southeast	SP	SAO JOAQUIM DA BARRA	0	0	0	0	0	0	0	1	0	4	1	6	10	6	11	7	9	0	0	0	0	0	0.333333	0.333333	1.66667	1.66667	3.66667	5.66667	10	9	8	9	193357	195510	197799	202608	205268	207907	198013	206004	207405	211389	212990	214535	223474	225308	227091
Southeast	MG	PEDRA AZUL	0	0	0	0	0	0	0	0	0	0	1	0	2	4	4	1	5	0	0	0	0	0	0	0	0	0.333333	0.333333	1	2	3.33333	3	3.33333	83707	85677	85877	65703	65734	65764	63019	64776	64638	83123	82962	82805	85121	85033	84951
North	PA	PARAUAPEBAS	0	0	0	0	0	0	17	19	5	14	5	2	6	14	13	12	11	0	0	0	0	5.66667	12	13.6667	12.6667	8	7	4.33333	6	11	13	12	160550	166642	172663	186324	192298	199243	232015	249260	258863	255755	263595	271172	283946	292211	300231
Northeast	BA	JUAZEIRO	0	0	0	0	0	2	5	3	3	6	7	12	4	12	13	16	29	0	0	0	0.666667	2.33333	3.33333	3.66667	4	5.33333	8.33333	7.66667	4	9.66667	13.6667	19.3333	403067	421168	427510	424199	429982	455339	480933	498707	507637	454405	457983	461441	491297	494867	498392
Northeast	AL	MACEIO	0	0	0	0	3	3	28	28	30	30	58	20	25	41	48	43	52	0	0	1	2	11.3333	19.6667	28.6667	29.3333	39.3333	36	34.3333	25	38	44	47.6667	1000524	1019511	1039147	1080373	1103192	1125835	1074187	1129811	1144494	1140682	1153236	1165310	1218197	1229071	1239316
Center-West	MT	PRIMAVERA DO LESTE	0	0	0	0	0	0	0	0	0	0	0	0	0	0	3	4	4	0	0	0	0	0	0	0	0	0	0	0	0	1	2.33333	3.66667	61681	65195	68963	76872	81249	85593	70813	73462	75080	83655	85696	87669	91029	93250	95412
Northeast	PI	ALTO MEDIO GURGUEIA	0	0	0	0	0	0	9	3	1	1	5	2	3	2	3	4	3	0	0	0	0	3	4	4.33333	1.66667	2.33333	2.66667	3.33333	3	2.66667	3	3.33333	78125	78837	79559	81080	81923	82756	83654	85997	86817	88076	88911	89712	90379	90798	91168
Southeast	MG	PECANHA	0	0	0	0	0	0	1	0	0	0	2	2	1	1	0	1	8	0	0	0	0	0.333333	0.333333	0.333333	0	0.666667	1.33333	1.66667	1	0.666667	0.666667	3	83915	83722	83369	82635	82227	81821	83918	86469	86596	81520	81296	81077	83269	83120	82978
Southeast	MG	IPATINGA	0	0	0	0	0	0	4	0	0	2	2	3	6	9	10	22	29	0	0	0	0	1.33333	1.33333	1.33333	0.666667	1.33333	2.33333	3.66667	6	8.33333	13.6667	20.3333	481554	487349	493563	506609	513826	520991	511634	525008	529788	526781	530842	534763	555214	559505	563624
North	PA	CAMETA	0	0	0	0	6	3	1	3	4	9	25	14	17	18	14	12	25	0	0	2	3	3.33333	2.33333	2.66667	5.33333	12.6667	16	18.6667	17	16.3333	14.6667	17	360154	365012	370189	381931	387069	393038	394937	412971	418678	437302	443710	449907	460628	466929	473045
Northeast	PI	CHAPADAS DO EXTREMO SUL PIAUIENSE	0	0	0	0	0	0	4	5	0	2	3	2	1	0	1	3	5	0	0	0	0	1.33333	3	3	2.33333	1.66667	2.33333	2	1	0.666667	1.33333	3	77298	78013	78787	82801	83817	84831	85184	87641	88536	82584	83068	83529	84144	84381	84591
Northeast	PI	FLORIANO	0	0	0	0	0	0	3	11	1	0	0	0	0	2	2	4	7	0	0	0	0	1	4.66667	5	4	0.333333	0	0	0	1.33333	2.66667	4.33333	119667	119969	120266	120890	121237	121544	119670	123244	123542	121544	121722	121889	122772	122843	122905
North	AC	SENA MADUREIRA	0	0	0	0	0	0	5	1	1	0	0	0	2	3	4	0	2	0	0	0	0	1.66667	2	2.33333	0.666667	0.333333	0	0.666667	2	3	2.33333	2	39073	39832	40663	41636	44020	45040	45298	47114	48029	50701	51693	52651	54071	55143	56200
South	RS	SAO JERONIMO	0	0	0	0	0	0	1	0	1	0	0	2	0	1	5	9	2	0	0	0	0	0.333333	0.333333	0.666667	0.333333	0.333333	0.666667	0.666667	0	2	5	5.33333	133485	134716	136049	138847	140396	141932	138612	143859	144965	143608	144516	145388	150885	151755	152570
Southeast	MG	SETE LAGOAS	0	0	0	0	0	0	1	2	3	0	0	0	2	8	7	13	24	0	0	0	0	0.333333	1	2	1.66667	1	0	0.666667	2	5.66667	9.33333	14.6667	354160	359882	365806	378248	385133	391965	394576	406025	411723	393875	397523	401042	417019	420806	424435
Southeast	SP	BRAGANCA PAULISTA	0	0	0	0	0	2	2	7	2	3	1	4	7	8	18	17	21	0	0	0	0.666667	1.33333	3.66667	3.66667	4	2	2.66667	4	7	11	14.3333	18.6667	428659	437486	446580	465672	476238	486724	455786	482164	488341	498171	504338	510299	534652	541502	548162
Northeast	PE	PETROLINA	0	0	0	0	0	3	4	3	3	15	25	8	9	11	5	11	34	0	0	0	1	2.33333	3.33333	3.33333	7	14.3333	16	14	9	8.33333	9	16.6667	358104	365301	372821	388607	397344	406016	412235	426818	434423	443991	451275	458314	478117	485792	493230
North	RO	ARIQUEMES	0	0	0	0	0	0	0	2	0	3	2	3	3	4	3	3	13	0	0	0	0	0	0.666667	0.666667	1.66667	1.66667	2.66667	2.66667	3	3.33333	3.33333	6.33333	143809	147865	151964	170000	165328	170055	158447	164622	167103	171150	173619	176003	192354	195532	198611
Northeast	CE	ITAPIPOCA	0	0	0	0	0	0	0	0	2	0	1	1	0	0	2	5	14	0	0	0	0	0	0	0.666667	0.666667	1	0.666667	0.666667	0	0.666667	2.33333	7	175206	178059	181229	187883	191566	195221	193865	202947	206025	206719	209434	212058	217008	219283	221466
Southeast	RJ	ITAGUAI	0	0	0	0	0	0	0	0	0	2	0	0	2	5	6	10	6	0	0	0	0	0	0	0	0.666667	0.666667	0.666667	0.666667	2	4.33333	7	7.33333	176842	180829	184851	193293	197966	202602	195692	212981	216985	223733	227693	231521	236012	239472	242814
Northeast	MA	GURUPI	0	0	0	0	0	0	2	1	0	2	3	7	2	2	4	7	10	0	0	0	0	0.666667	1	1	1	1.66667	4	4	2	2.66667	4.33333	7	185869	190605	194387	202328	206720	211082	201974	208303	210774	221643	224656	227567	230990	233474	235816
Northeast	PB	JOAO PESSOA	0	0	0	0	0	2	3	4	3	3	0	6	18	9	11	2	15	0	0	0	0.666667	1.66667	3	3.33333	3.33333	2	3	8	18	12.6667	7.33333	9.33333	885384	902681	917680	949192	966633	983925	971073	997167	1009305	1034615	299598	302107	311001	314049	316978
Northeast	PE	VITORIA DE SANTO ANTAO	0	0	0	0	3	2	0	2	6	3	4	0	2	7	7	6	7	0	0	1	1.66667	1.66667	1.33333	2.66667	3.66667	4.33333	2.33333	2	2	5.33333	6.66667	6.66667	200017	201541	203174	206601	208497	210380	200013	206255	206917	215580	216930	218234	224631	226008	227346
Southeast	MG	CARATINGA	0	0	0	0	0	0	0	1	4	1	0	0	2	3	4	8	11	0	0	0	0	0	0.333333	1.66667	2	1.66667	0.333333	0.666667	2	3	5	7.66667	241444	242366	243244	240150	241148	242133	241631	250479	251778	253421	254424	255385	264130	265282	266390
Center-West	MT	ALTO TELES PIRES	0	0	0	0	0	1	2	6	6	6	4	8	6	7	8	7	5	0	0	0	0.333333	1	3	4.66667	6	5.33333	6	6	6	7	7.33333	6.66667	107597	112264	117059	127176	132377	137893	154770	162055	168115	191228	198104	204751	216083	223705	231128
Northeast	CE	BAIXO CURU	0	0	0	0	0	0	0	0	0	1	2	1	3	0	2	2	5	0	0	0	0	0	0	0	0.333333	1	1.33333	2	3	1.66667	1.33333	3	90619	92522	94339	98151	100259	102352	99370	103930	105411	105567	106870	108129	110579	111666	112709
Center-West	GO	ENTORNO DE BRASILIA	0	0	0	0	0	0	4	8	6	14	12	15	24	24	21	28	46	0	0	0	0	1.33333	4	6	9.33333	10.6667	13.6667	17	24	23	24.3333	31.6667	856301	887279	920738	990969	1029841	1068417	960906	1004910	1023514	1052411	1070631	1088240	1144025	1164835	1185247
Northeast	PB	CATOLE DO ROCHA	0	0	0	0	0	1	1	9	6	6	3	9	23	9	18	15	35	0	0	0	0.333333	0.666667	3.66667	5.33333	7	5	6	11.6667	23	16.6667	14	22.6667	107311	107524	107645	107903	108045	108186	111991	115164	115876	116056	791963	801475	829841	841221	852161
Northeast	SE	TOBIAS BARRETO	0	0	0	0	0	0	0	0	1	0	0	1	2	0	0	2	7	0	0	0	0	0	0	0.333333	0.333333	0.333333	0.333333	1	2	0.666667	0.666667	3	101416	102591	103815	106382	107801	109210	105463	108686	109486	108725	109399	110051	113834	114584	115317
Northeast	PB	UMBUZEIRO	0	0	0	0	2	1	2	5	3	4	1	3	1	5	1	1	6	0	0	0.666667	1	1.66667	2.66667	3.33333	4	2.66667	2.66667	1.66667	1	2.33333	2.33333	2.66667	54233	54000	53693	53052	52698	52345	53472	55352	55375	53980	101223	101502	103553	103926	104288
Northeast	PB	PATOS	0	0	0	0	0	0	1	1	0	2	1	2	3	1	2	3	6	0	0	0	0	0.333333	0.666667	0.666667	1	1	1.66667	2	3	2	2	3.66667	118552	119492	120390	122274	122987	124018	123069	126602	127449	126683	140295	141088	144610	145596	146545
Southeast	MG	POCOS DE CALDAS	0	0	0	0	0	0	2	0	0	2	2	0	2	3	1	12	14	0	0	0	0	0.666667	0.666667	0.666667	0.666667	1.33333	1.33333	1.33333	2	2	5.33333	9	314362	318350	322027	329747	334020	338261	326772	339262	341925	342055	344490	346837	359879	362471	364958
North	RO	GUAJARA-MIRIM	0	0	0	0	0	0	2	0	0	0	1	0	2	0	1	1	4	0	0	0	0	0.666667	0.666667	0.666667	0	0.333333	0.333333	1	2	1	0.666667	2	61321	62749	64353	71406	69580	71427	68825	70605	71705	71369	72298	73193	79879	81101	82285
North	TO	ARAGUAINA	0	0	0	0	0	0	6	1	3	3	0	1	1	3	2	11	9	0	0	0	0	2	2.33333	3.33333	2.33333	2	1.33333	0.666667	1	2	5.33333	7.33333	234422	238172	242294	248070	255735	260490	238556	244103	245407	278707	282510	286178	298783	302864	306848
Northeast	CE	IGUATU	0	0	0	0	0	0	4	2	0	2	2	1	6	4	5	5	6	0	0	0	0	1.33333	2	2	1.33333	1.33333	1.66667	3	6	5	4.66667	5.33333	211442	212569	213846	216527	218011	219485	217057	225093	226462	222867	223885	224865	228445	229208	229940
Southeast	MG	CAMPO BELO	0	0	0	0	0	0	0	0	0	0	0	1	1	0	1	1	6	0	0	0	0	0	0	0	0	0	0.333333	0.666667	1	0.666667	0.666667	2.66667	106660	107560	108499	62600	63193	63781	63756	66163	66744	111762	112243	112706	116606	117153	117675
Center-West	MT	ALTA FLORESTA	0	0	0	0	0	0	2	0	0	5	0	1	1	1	5	2	0	0	0	0	0	0.666667	0.666667	0.666667	1.66667	1.66667	2	0.666667	1	2.33333	2.66667	2.33333	90007	90029	90056	90109	90140	90169	101636	105214	106685	99141	99848	100528	101672	102328	102968
South	PR	CERRO AZUL	0	0	0	0	0	0	0	0	0	0	0	0	1	0	2	0	0	0	0	0	0	0	0	0	0	0	0	0.333333	1	1	0.666667	0.666667	29264	29226	29163	29031	28957	28885	30412	31472	31661	29041	29017	28994	29872	29885	29896
Northeast	PB	CAMPINA GRANDE	0	0	0	0	1	1	5	1	0	4	12	16	16	20	14	9	11	0	0	0.333333	0.666667	2.33333	2.33333	2	1.66667	5.33333	10.6667	14.6667	16	16.6667	14.3333	11.3333	467237	471531	475315	483259	487655	492019	485437	498947	502159	502669	496431	499372	512068	515715	519220
Southeast	MG	PIRAPORA	0	0	0	0	0	0	2	0	0	0	2	1	4	3	2	4	5	0	0	0	0	0.666667	0.666667	0.666667	0	0.666667	1	2.33333	4	3	3	3.66667	155685	156509	157302	158965	159885	160798	159787	165668	166640	164903	165683	166434	172272	173146	173984
North	PA	FUROS DE BREVES	0	0	0	0	0	0	3	2	1	3	11	0	4	0	6	5	3	0	0	0	0	1	1.66667	2	2	5	4.66667	5	4	3.33333	3.66667	4.66667	169473	171788	174630	181076	183898	187176	194034	206517	210530	204114	207067	209923	214867	217765	220578
Southeast	SP	BARRETOS	0	0	0	0	0	0	0	0	0	0	2	1	0	2	1	5	3	0	0	0	0	0	0	0	0	0.666667	1	1	0	1	2.66667	3	127698	128619	129589	131623	132750	133868	131054	136777	137708	135466	136154	136817	142082	142901	143699
North	AM	RIO NEGRO	0	0	0	0	0	0	4	1	1	6	1	3	6	1	1	1	5	0	0	0	0	1.33333	1.66667	2	2.66667	2.66667	3.33333	3.33333	6	2.66667	1	2.33333	75584	76614	77664	79439	80858	82053	95248	99247	101716	96483	98184	99826	106390	108516	110602
Northeast	PB	CARIRI OCIDENTAL	0	0	0	0	0	0	5	0	2	3	11	8	5	1	3	3	3	0	0	0	0	1.66667	1.66667	2.33333	1.66667	5.33333	7.33333	8	5	3	2.33333	3	113367	113571	113680	104988	105098	105349	110307	113795	114634	121531	183190	184416	188792	189926	191015
Southeast	MG	PARA DE MINAS	0	0	0	0	0	0	0	0	0	0	0	0	0	1	1	5	2	0	0	0	0	0	0	0	0	0	0	0	0	0.666667	2.33333	2.66667	108809	110290	111755	114829	116532	118221	117173	122254	123700	123379	124629	125834	130961	132284	133521
Northeast	PB	PIANCO	0	0	0	0	0	0	0	2	0	2	2	2	2	1	2	2	3	0	0	0	0	0	0.666667	0.666667	1.33333	1.33333	2	2	2	1.66667	1.66667	2.33333	71505	71246	70931	70269	69899	69538	72545	74580	74786	70696	114572	114892	117086	117512	117921
Northeast	RN	BAIXA VERDE	0	0	0	0	0	0	2	0	0	2	2	3	3	1	2	0	2	0	0	0	0	0.666667	0.666667	0.666667	0.666667	1.33333	2.33333	2.66667	3	2	1	1.33333	57457	58029	58660	59987	60720	61451	58828	60696	61055	62935	63385	63818	66512	66742	67253
Northeast	BA	BARRA	0	0	0	0	0	0	0	3	1	1	3	4	3	3	1	6	4	0	0	0	0	0	1	1.33333	1.66667	1.66667	2.66667	3.33333	3	2.33333	3.33333	3.66667	158434	162630	163934	164655	166231	169646	168902	175030	176438	171646	172546	173417	184705	185881	186837
Northeast	CE	SERTAO DE SENADOR POMPEU	0	0	0	0	0	1	4	1	0	3	1	4	7	5	2	4	7	0	0	0	0.333333	1.66667	2	1.66667	1.33333	1.33333	2.66667	4	7	4.66667	3.66667	4.33333	208016	208504	208786	209379	209707	210032	215459	221452	223066	217522	218255	218958	222214	222725	223216
Northeast	MA	COELHO NETO	0	0	0	0	0	0	0	0	2	0	1	1	1	0	1	2	2	0	0	0	0	0	0	0.666667	0.666667	1	0.666667	1	1	0.666667	1	1.66667	75470	75938	76313	77096	77531	77962	81923	84209	85066	87256	88189	89087	90137	90879	91578
Northeast	RN	CHAPADA DO APODI	0	0	0	0	0	0	2	2	0	0	2	1	0	1	2	1	1	0	0	0	0	0.666667	1.33333	1.33333	0.666667	0.666667	1	1	0	1	1.33333	1.33333	70490	70790	71023	71510	71780	72048	72553	74576	74949	72447	72615	72774	75370	76856	75814
North	AM	MANAUS	0	0	0	4	0	3	13	7	3	5	9	8	38	32	41	46	34	0	1.33333	1.33333	2.33333	5.33333	7.66667	7.66667	5	5.66667	7.33333	18.3333	38	37	39.6667	40.3333	1643417	1683838	1725671	1796541	1853173	1900791	1828564	1935545	1968949	2039536	2073759	2106861	2242712	2285623	2327732
Northeast	PI	PICOS	0	0	0	0	0	0	0	2	0	2	0	3	4	2	3	4	3	0	0	0	0	0	0.666667	0.666667	1.33333	0.666667	1.66667	2.33333	4	3	3	3.33333	187050	188528	190009	193128	194851	196562	196059	201291	202753	199627	200731	201785	203273	203813	204288
Northeast	RN	MEDIO OESTE	0	0	0	0	0	0	0	0	0	2	1	0	0	1	0	0	2	0	0	0	0	0	0	0	0.666667	1	1	0.333333	0	0.333333	0.333333	0.666667	37369	37607	37860	38388	38682	38972	37898	39143	39323	39041	39196	39342	40830	39759	41204
Northeast	CE	CARIRI	0	0	0	0	1	0	2	3	0	3	5	2	6	10	8	8	11	0	0	0.333333	0.333333	1	1.66667	1.66667	2	2.66667	3.33333	4.33333	6	8	8.66667	9	474939	482100	488926	503256	511187	519055	507560	523136	528398	534139	539267	544222	555282	559490	563528
Southeast	RJ	CAMPOS DOS GOYTACAZES	0	0	0	0	0	0	3	2	1	2	5	3	10	5	8	12	6	0	0	0	0	1	1.66667	2	1.66667	2.66667	3.33333	6	10	7.66667	8.33333	8.66667	529467	534026	538123	546722	551482	556204	546670	560993	564172	587975	592796	597456	602872	606552	610105
Center-West	MS	BAIXO PANTANAL	0	0	0	0	1	1	0	2	2	1	1	2	6	2	1	0	5	0	0	0.333333	0.666667	0.666667	1	1.33333	1.66667	1.33333	1.33333	3	6	3	1	2	125591	126672	127758	130041	131303	132556	129089	133023	133799	138692	139796	140862	144615	145838	147030
Southeast	MG	ITUIUTABA	0	0	0	0	0	0	0	0	1	0	0	0	1	0	1	1	4	0	0	0	0	0	0	0.333333	0.333333	0.333333	0	0.333333	1	0.666667	0.666667	2	133005	133664	133938	134514	134831	135147	136393	141092	141790	143348	144141	144903	150109	150977	151811
Northeast	MA	AGLOMERACAO URBANA DE SAO LUIS	0	0	0	0	0	0	5	3	1	5	5	5	8	18	19	21	13	0	0	0	0	1.66667	2.66667	3	3	3.66667	5	6	8	15	19.3333	17.6667	1098926	1123406	1147874	1199235	1227659	1255879	1210027	1249141	1266366	1309330	1327649	1345368	1366266	1381459	1395792
Southeast	MG	BELO HORIZONTE	0	0	0	0	0	0	2	4	2	28	33	35	23	35	40	67	86	0	0	0	0	0.666667	2	2.66667	11.3333	21	32	30.3333	23	32.6667	47.3333	64.3333	4352377	4432345	4512743	4678469	4771678	4864207	4822879	4928686	4993328	4772562	4811930	4850003	5038298	5079662	5119360
South	RS	PORTO ALEGRE	0	0	0	1	0	0	2	0	1	0	3	6	9	15	43	34	64	0	0.333333	0.333333	0.333333	0.666667	0.666667	1	0.333333	1.33333	3	6	9	22.3333	30.6667	47	3479683	3523369	3569023	3664821	3717842	3770472	3645768	3708270	3734095	3628029	3643619	3658690	3793589	3810077	3825590
Northeast	PB	ESPERANCA	0	0	0	0	0	0	1	0	0	0	0	0	0	0	0	0	1	0	0	0	0	0.333333	0.333333	0.333333	0	0	0	0	0	0	0	0.333333	48398	48599	48786	49175	49390	49605	51501	52927	53366	53596	26203	26300	26999	27125	27246
Center-West	GO	GOIANIA	0	0	0	0	0	0	7	11	2	13	14	20	23	15	28	27	31	0	0	0	0	2.33333	6	6.66667	8.66667	9.66667	15.6667	19	23	22	23.3333	28.6667	1742120	1782736	1824081	1910880	1958925	2006598	2032478	2089437	2128243	2116730	2149212	2180625	2286843	2324180	2360847
Northeast	PB	LITORAL SUL	0	0	0	0	0	0	0	0	1	0	0	0	0	0	1	1	1	0	0	0	0	0	0	0.333333	0.333333	0.333333	0	0	0	0.333333	0.666667	1	75463	76432	77495	79725	80959	82184	79965	82198	82953	82425	83329	83948	86284	87040	87764
North	RR	BOA VISTA	0	0	0	0	0	0	0	1	1	1	1	3	0	1	2	5	5	0	0	0	0	0	0.333333	0.666667	1	1	1.66667	1.33333	0	1	2.66667	4	239904	246818	254273	271848	278583	287175	278376	292491	298575	320521	327413	334076	347279	353589	359804
Northeast	MA	CAXIAS	0	0	0	0	0	0	0	0	1	0	3	3	8	3	3	5	6	0	0	0	0	0	0	0.333333	0.333333	1.33333	2	4.66667	8	4.66667	3.66667	4.66667	368259	371715	375003	389533	393194	396827	397478	408534	411824	416327	420297	424136	428592	431688	434610
Center-West	MT	ALTO PANTANAL	0	0	0	0	0	0	2	2	3	3	2	2	4	1	2	1	1	0	0	0	0	0.666667	1.33333	2.33333	2.66667	2.66667	2.33333	2.66667	4	2.33333	1.33333	1.33333	125890	126955	128050	130348	131621	132883	127705	131700	132313	132178	132763	133324	134262	134727	135181
Southeast	MG	DIVINOPOLIS	0	0	0	0	0	0	0	0	0	0	0	0	1	0	5	4	6	0	0	0	0	0	0	0	0	0	0	0.333333	1	2	3	5	401149	408352	415992	432027	440902	449710	456480	472696	480579	483473	490510	497307	519830	526918	533720
Northeast	BA	SALVADOR	0	0	0	0	0	1	6	7	3	7	15	17	26	32	26	40	32	0	0	0	0.333333	2.33333	4.66667	5.33333	5.66667	8.33333	13	19.3333	26	28	32.6667	32.6667	2846777	3132047	3183327	3027423	3079048	3408273	3598454	3687316	3752436	3458571	3492119	3524564	3758256	3792317	3824450
Northeast	SE	ARACAJU	0	0	0	0	0	0	0	2	1	2	7	5	4	14	6	6	11	0	0	0	0	0	0.666667	1	1.66667	3.33333	4.66667	5.33333	4	8	8.66667	7.66667	692048	706277	720477	593849	603050	612180	619873	639553	647954	835816	848093	859965	899239	912647	925744
Northeast	CE	PACAJUS	0	0	0	0	0	0	0	0	3	2	3	3	2	2	1	2	0	0	0	0	0	0	0	1	1.66667	2.66667	2.66667	2.66667	2	1.66667	1.66667	1	81000	83705	86417	92111	95262	98390	103891	110769	114051	117025	120032	122939	127094	129680	132165
Northeast	PI	LITORAL PIAUIENSE	0	0	0	0	1	0	5	3	0	1	3	4	1	0	2	0	5	0	0	0.333333	0.333333	2	2.66667	2.66667	1.33333	1.33333	2.66667	2.66667	1	1	0.666667	2.33333	276211	278719	281392	287005	290109	293192	292040	300492	303053	303511	306604	308877	311181	312365	313407
Southeast	MG	UBERABA	0	0	0	0	0	0	0	0	0	0	1	0	1	1	2	4	2	0	0	0	0	0	0	0	0	0.333333	0.333333	0.666667	1	1.33333	2.33333	2.66667	295303	300841	305564	315478	320963	326409	333690	340748	345591	346024	350276	354385	369623	373951	378103
Southeast	MG	LAVRAS	0	0	0	0	0	0	0	0	0	1	3	0	0	0	0	0	3	0	0	0	0	0	0	0	0.333333	1.33333	1.33333	1	0	0	0	1	136312	137633	139009	141892	143489	145075	143686	149409	150789	149669	150824	151937	157743	158962	160132
Northeast	PI	TERESINA	0	0	0	0	0	0	1	2	0	2	2	3	5	2	3	6	9	0	0	0	0	0.333333	1	1	1.33333	1.33333	2.33333	3.33333	5	3.33333	3.66667	6	890887	903503	916500	942881	957769	972648	946909	975724	984992	995499	1004729	1013654	1021250	1025918	1030042
Northeast	CE	CARIRIACU	0	0	0	0	0	1	0	1	2	1	0	2	3	0	0	0	1	0	0	0	0.333333	0.333333	0.666667	1	1.33333	1	1	1.66667	3	1	0	0.333333	58087	58826	59660	61410	62379	63340	57201	58700	58818	56885	56901	56914	57601	57579	57557
Northeast	PE	SUAPE	0	0	0	0	0	1	0	0	0	0	0	0	0	1	1	1	3	0	0	0	0.333333	0.333333	0.333333	0	0	0	0	0	0	0.666667	1	1.66667	216929	220632	224518	232676	237192	241673	232257	244045	247095	265662	269436	273084	284078	288043	291887
Northeast	RN	MACAIBA	0	0	0	0	0	2	0	0	0	0	0	0	1	2	1	0	4	0	0	0	0.666667	0.666667	0.666667	0	0	0	0	0.333333	1	1.33333	1	1.66667	247304	252801	258420	270545	277077	283561	265924	274317	277499	288836	292511	296063	183481	185717	187896
Northeast	RN	MOSSORO	0	0	0	0	0	0	0	2	1	1	1	1	0	3	0	1	4	0	0	0	0	0	0.666667	1	1.33333	1	1	0.666667	0	1	1.33333	1.66667	277382	281014	283818	289701	292955	296189	304322	313769	317478	332679	337110	341395	358621	363615	368479
Southeast	SP	RIO CLARO	0	0	0	0	0	1	1	1	1	0	0	1	1	1	1	0	2	0	0	0	0.333333	0.666667	1	1	0.666667	0.333333	0.333333	0.666667	1	1	0.666667	1	221680	225528	229528	80072	81817	83549	79542	83915	85045	242577	244550	246456	256899	259149	261336
Northeast	CE	FORTALEZA	0	0	0	0	4	2	6	6	1	9	9	18	9	11	13	4	19	0	0	1.33333	2	4	4.66667	4.33333	5.33333	6.33333	12	12	9	11	9.33333	12	2909748	2967292	3020555	3132391	3194274	3255701	3273799	3345525	3393209	3351112	3389387	3426405	3501448	3533255	3563797
Northeast	PE	RECIFE	0	0	0	3	0	1	5	2	4	4	2	17	17	19	5	7	15	0	1	1	1.33333	2	2.66667	3.66667	3.33333	3.33333	7.66667	12	17	13.6667	10.3333	9	3033864	3066066	3100479	3172687	3212649	3252318	3271499	3329359	3361068	3259055	3279887	3300035	3397463	3418795	3439465
Center-West	MT	CUIABA	0	0	0	0	0	0	3	1	0	2	3	2	3	4	3	1	3	0	0	0	0	1	1.33333	1.33333	1	1.66667	2.33333	2.66667	3	3.33333	2.66667	2.33333	758596	771123	784656	813059	828774	844367	806450	833370	842021	851587	860003	868141	881902	890277	898432
Northeast	RN	NATAL	0	0	0	0	0	0	0	0	0	0	4	0	2	2	0	2	4	0	0	0	0	0	0	0	0	1.33333	1.33333	2	2	1.33333	1.33333	2	874487	892655	909391	944210	963657	982946	968749	999357	1013176	1030764	1044159	1057113	1110019	1125134	1139863
North	AP	OIAPOQUE	0	0	0	0	0	0	0	0	0	0	0	0	0	1	0	0	0	0	0	0	0	0	0	0	0	0	0	0	0	0.333333	0.333333	0	20467	21065	21736	22197	23929	24704	27837	29286	30253	29509	30270	31004	32779	33607	34426
Center-West	DF	BRASILIA	0	0	0	0	0	0	0	0	0	1	0	0	1	0	0	0	0	0	0	0	0	0	0	0	0.333333	0.333333	0.333333	0.333333	1	0.333333	0	0	2097447	2145839	2189789	2282049	2333108	2383784	2455903	2557158	2606885	2570160	2609998	2648532	2789761	2852372	2914830
Total			110	96	18	16	1154	2454	6485	7316	4886	10166	14104	17272	21823	28112	34324	40660	42775	74.6667	43.3333	396	1208	3364.33	5418.33	6229	7456	9718.67	13847.3	17733	21823	28086.3	34365.3	39253	172385826	174632960	176863451	181581024	184184264	186770562	183888841	189612814	191446848	190755799	192379287	193917083	201062789	202758031	204338473
[truncated: 31 more columns]
